# Supplementary material for: The effectiveness of solar radiation management for marine cloud brightening geoengineering by fine sea spray in worldwide different climatic regions
Source: Copernicus journal article supplement (doi:10.5194/egusphere-2024-2263), 2024-08-09
Supplement: Supplementary file 1 [file egusphere-2024-2263-supplement-version2.pdf]

1 **Supplementary Information for “The effectiveness of solar radiation management for**  
2 **marine cloud brightening geoengineering by fine sea spray in worldwide different**  
3 **climatic regions”**

4  
5 Zhe Song<sup>1\*</sup>, Shaocai Yu<sup>2,3\*+</sup>, Pengfei Li<sup>4+</sup>, Ningning Yao<sup>3,2</sup>, Lang Chen<sup>3,2</sup>, Yuhai Sun<sup>2</sup>, Boqiong Jiang<sup>2</sup>,  
6 Daniel Rosenfeld<sup>5</sup>

7  
8 <sup>1</sup> Research Center for Air Pollution and Health; Key Laboratory of Environmental Remediation and  
9 Ecological Health, Ministry of Education, College of Environment and Resource Sciences, Zhejiang  
10 University, Hangzhou, Zhejiang 310058, P.R. China

11 <sup>2</sup> Zhejiang Province Key Laboratory of Solid Waste Treatment and Recycling; School of Environmental  
12 Sciences and Engineering, Zhejiang Gongshang University, Hangzhou 310018, China

13 <sup>3</sup> School of Statistics and Mathematics, Zhejiang Gongshang University, Hangzhou 310018, China

14 <sup>4</sup> State Key Laboratory of Infrared Physics, Shanghai Institute of Technical Physics, Chinese Academy of  
15 Sciences, Shanghai 200031, China

16 <sup>5</sup> Institute of Earth Sciences, The Hebrew University of Jerusalem, Jerusalem, Israel

17  
18 \*Equal contribution

19 <sup>+</sup>*Correspondence to:* Shaocai Yu (shaocaiyu@zjgsu.edu.cn), Pengfei Li (pengfeili@mail.sitp.ac.cn)

20  
21 **This file includes:**

22 Text S1 to S2

23 Figures S1 to S28

24 Tables S1 to S3

25

26

27

## Supplementary Text S1

We use the method of Martin et al. (1994) to calculate the cloud effective radius:

$$r_e = \left( \frac{3q_L}{4\pi\rho_w k N_{tot}} \right)^{\frac{1}{3}}$$

where  $q_L$  is the liquid water content,  $\rho_w$  is the density of water,  $N_{tot}$  is the cloud droplet number concentration (CDNC), and  $k$  is the ratio between the cube of the mean volume radius and the cube of the effective radius. Martin et al. (1994) estimated  $k$  for unpolluted (marine) stratocumulus clouds to be equal to 0.80 and for polluted (continental) stratocumulus clouds to be equal to 0.67. Here, we refer to the method of Goddard et al. (2022) and similarly set  $k$  to 0.80 for cloud condensation nuclei (CCN) concentrations of 0–50  $\text{cm}^{-3}$  at 0.1% saturation, 0.74 for CCN concentrations of 50–150  $\text{cm}^{-3}$  and equal to 0.67 where CCN concentrations are greater than 150  $\text{cm}^{-3}$ .

We use the method of Wood (2007) and Stephens (1978) to approximate the column cloud optical thickness (COT):

$$\tau \approx \frac{3}{2} \int_{z=0}^h \frac{q_L(z)}{\rho_w r_e(z)} dz$$

when integrated from the surface to a specified height,  $h$ . The height is determined by the highest grid cell containing a liquid cloud (Goddard et al., 2022).

We use the method of Schwartz et al. (2002) to approximate the column mean cloud albedo:

$$\alpha_c \approx \frac{\tau(1-g) + 0.097}{\tau(1-g) + 1.43}$$

where  $g$  is the asymmetry parameter we assume  $g$  to be 0.834 for  $r_e \leq 6 \mu\text{m}$ , 0.873 for  $r_e \geq 19 \mu\text{m}$ , and to increase linearly between these  $r_e$  boundaries (Goddard et al., 2022).

## Supplementary Text S2

The direct radiative effect of aerosols is mainly determined by their own optical properties. In WRF-CMAQ, the emitted sea-salt aerosol particle size distributions are adjusted to the local relative humidity (Kelly et al., 2010; Zhang et al., 2005). The dry diameter of sea-salt aerosols injected into the five regions is about 0.11–0.15  $\mu\text{m}$  (Figs. 1a and S9), and the wet diameter is about 0.22–0.3  $\mu\text{m}$  (Fig. S10). The single scattering albedo (SSA) of aerosols describes the ratio of aerosol particles' ability to absorb and scatter solar radiations. After the injection of sea-salt aerosols, the SSA of the accumulation mode aerosols in the five regions generally increases by about 0.003–0.005, and in some regions within the area, the SSA increases by over 0.007, with an average increase of 0.001–0.003 in sensitive areas (Fig. S11). This indicates that the injected sea-salt aerosol particles could scatter sunlight more effectively than absorb it, causing solar radiation to be reflected back into space. The asymmetry factor of aerosols is a parameter describing the directionality of aerosol particle scattering of sunlight, and an important factor for evaluating direct aerosol radiative forcing (Zhao et al., 2018). The injection of sea-salt aerosols in the five regions reduces the asymmetry factor by 0.007–0.029, with an average reduction of 0.01–0.027 in sensitive areas (Fig. S12). This indicates that the injected sea-salt aerosols tend to scatter more uniformly or backward rather than in a forward direction.

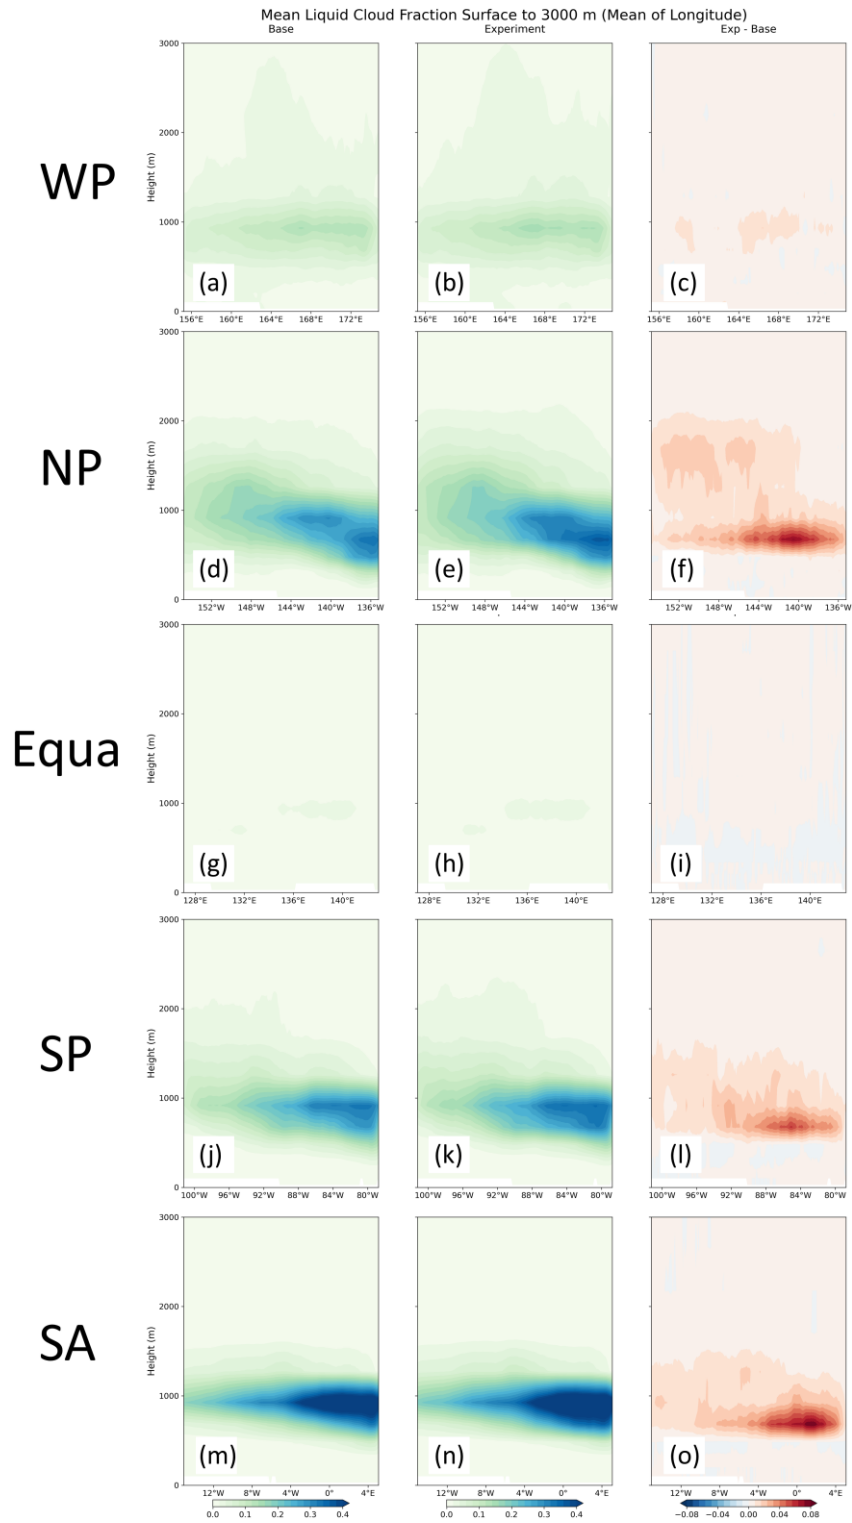

**Figure S1.** Vertical cross sections of the mean liquid cloud fraction from the surface to 3000 m altitude for five regions, with cross sections longitudinally averaged. The first to third columns are Base, the sensitivity experiment with a uniform injection of  $10^{-9} \text{ kg m}^{-2} \text{ s}^{-1}$  of sea-salt aerosols over the entire region, and Exp - Base, respectively.

65  
66  
67  
68  
69  
70

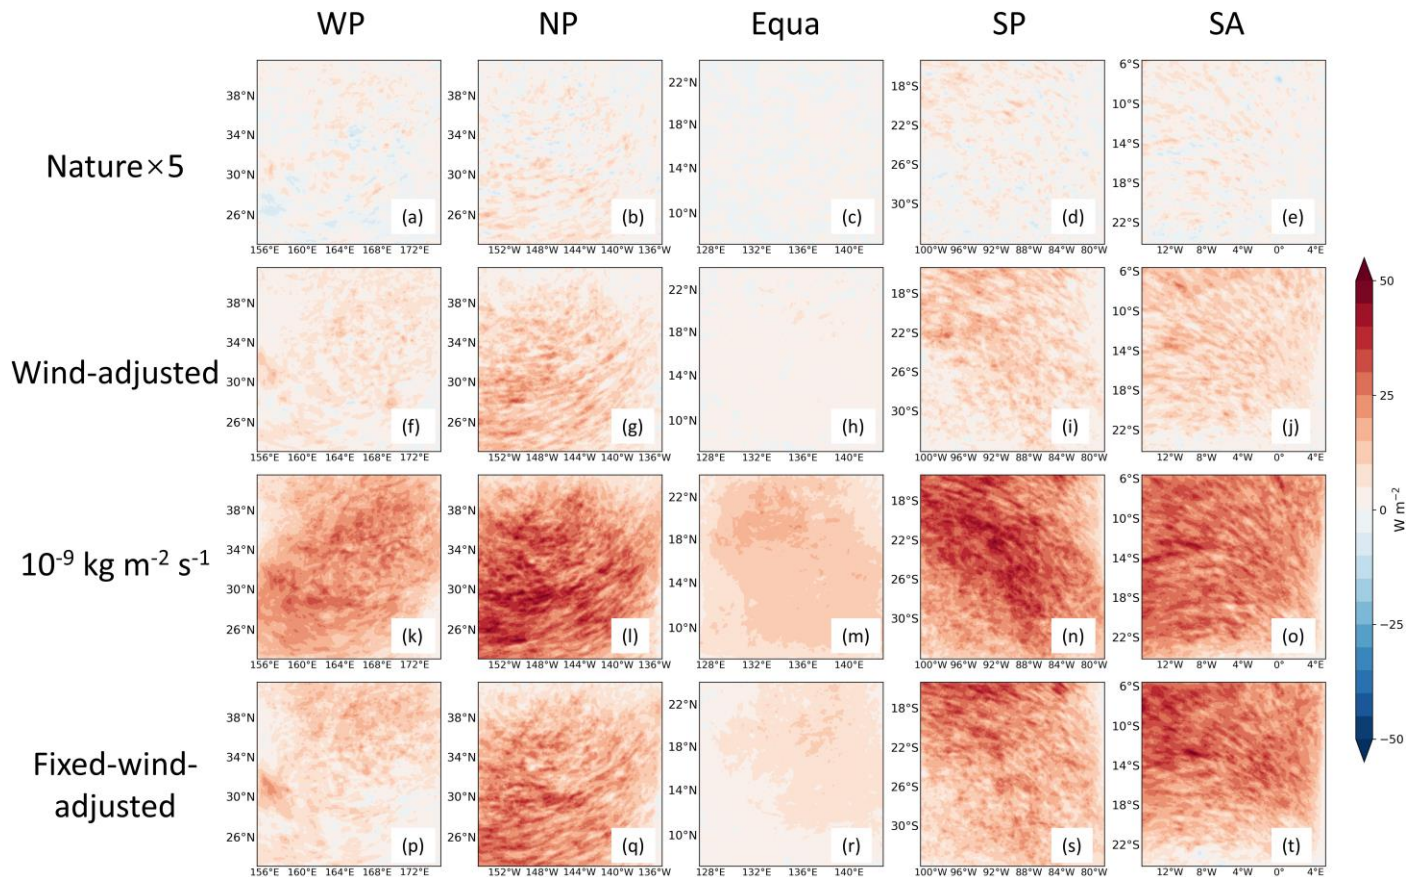

Variations (Exp - Base) of total upward shortwave radiative flux (SW\_TOT) at the TOA

**Figure S2.** Spatial distribution of the differences (Exp - Base) in the SW\_TOT at the TOA due to the injection of sea-salt aerosols in different ways in five oceanic regions.

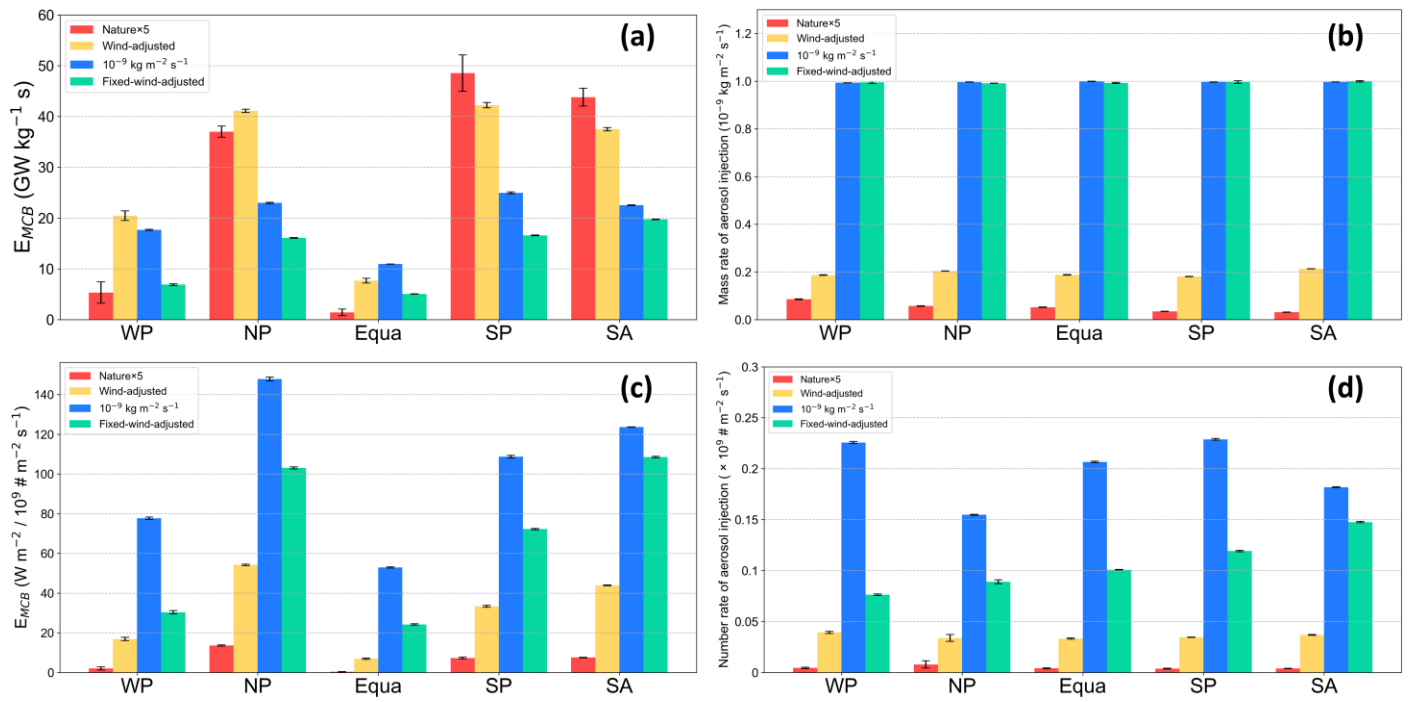

**Figure S3.** The MCB efficiency (a) and injection rates (b) in terms of aerosol mass, and MCB efficiency (c) and injection rates (d) in terms of aerosol number across different strategies in five ocean regions.

76  
77  
78  
79

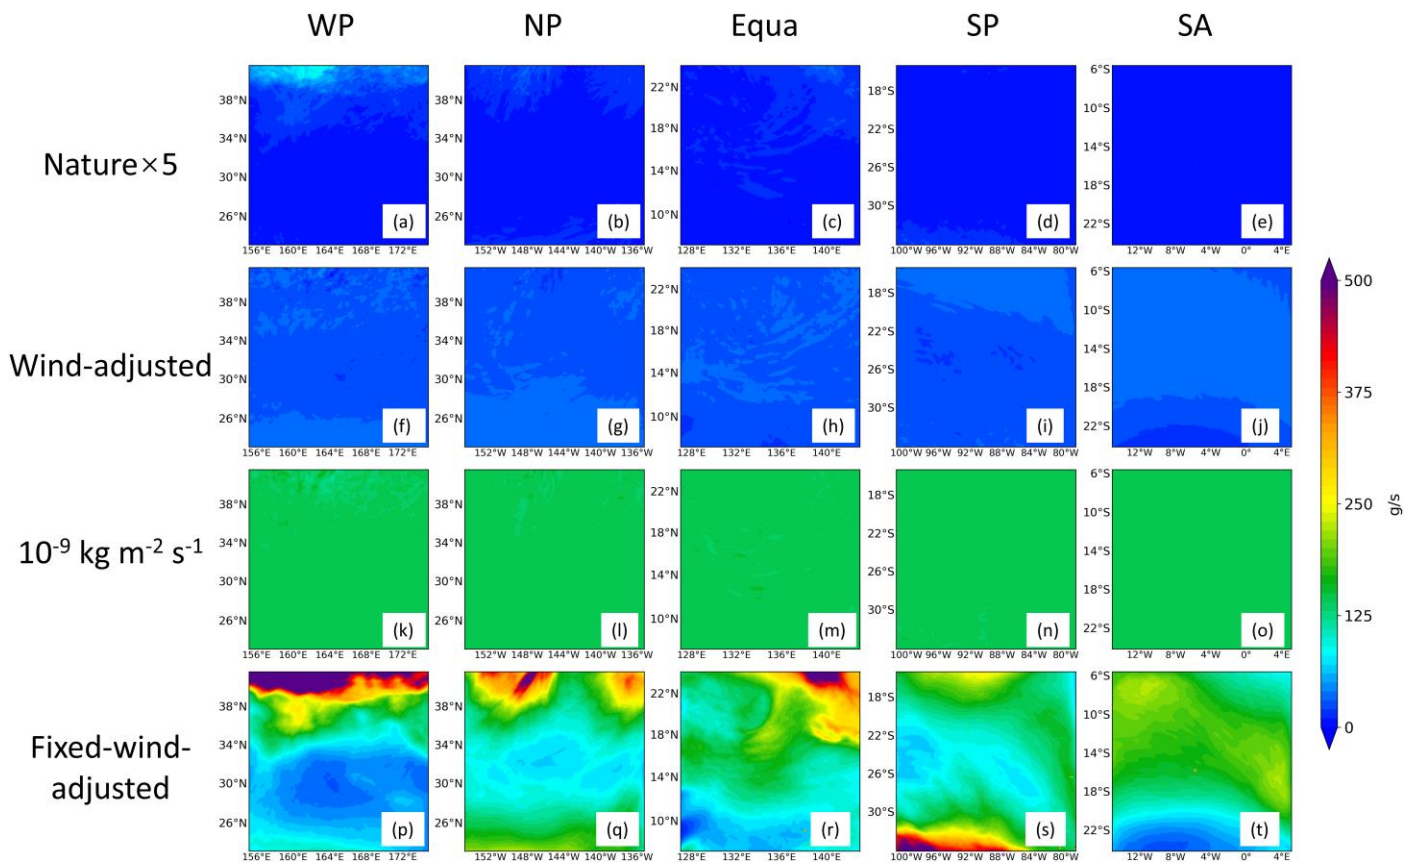

80 **Figure S4.** Spatial distribution of the differences (Exp - Base) in the sea-salt emissions due to the injection of  
 81 sea-salt aerosols in different ways in five oceanic regions.  
 82  
 83

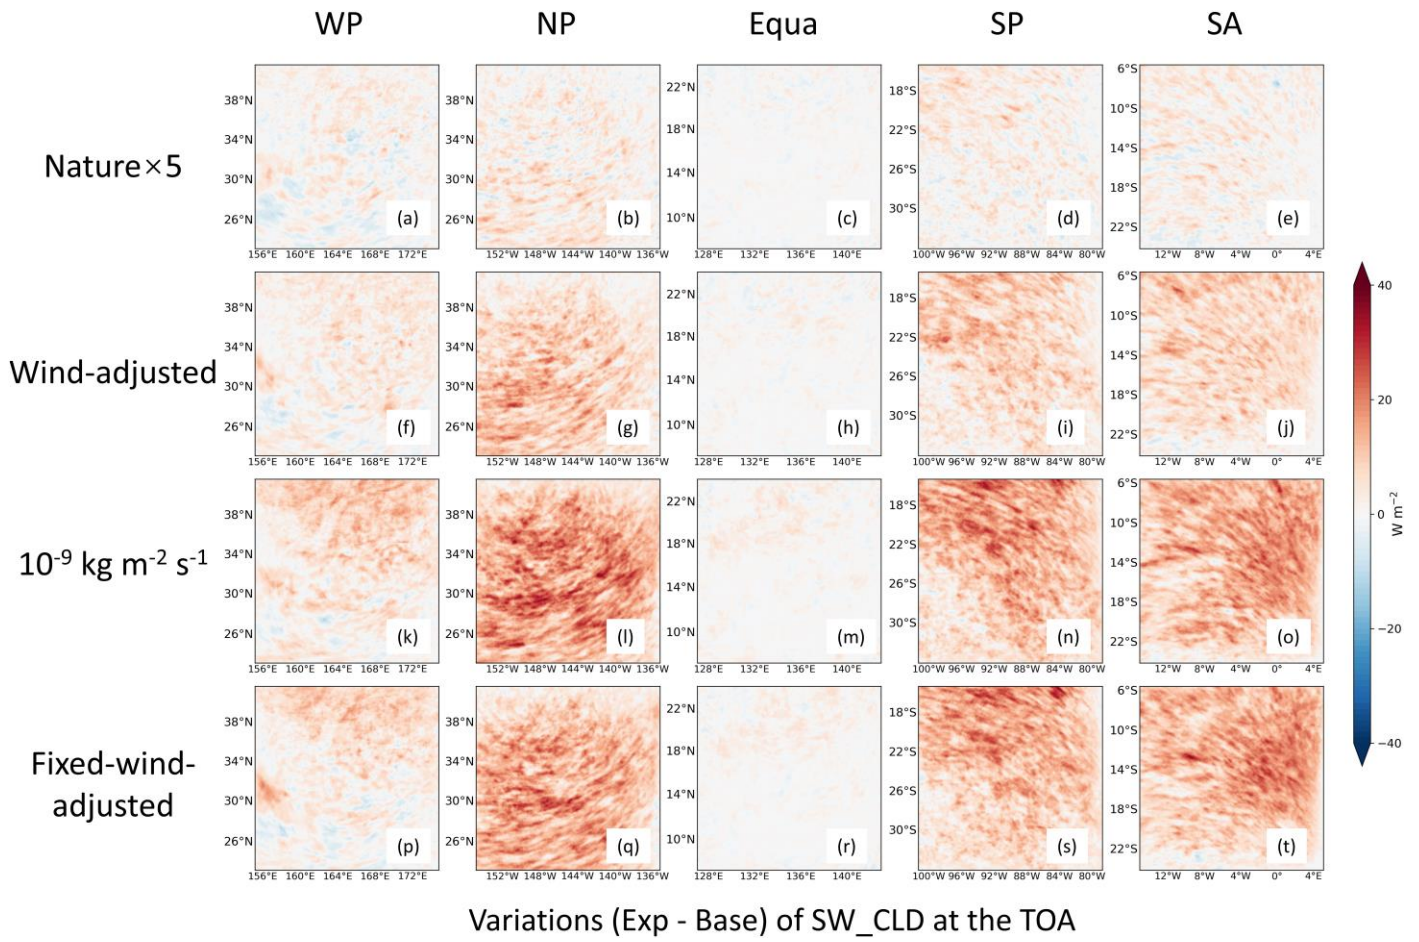

Variations (Exp - Base) of SW\_CLD at the TOA

**Figure S5.** Same caption as Fig. S2, but for the results of SW\_CLD ( $\text{W m}^{-2}$ ).

84

85

86



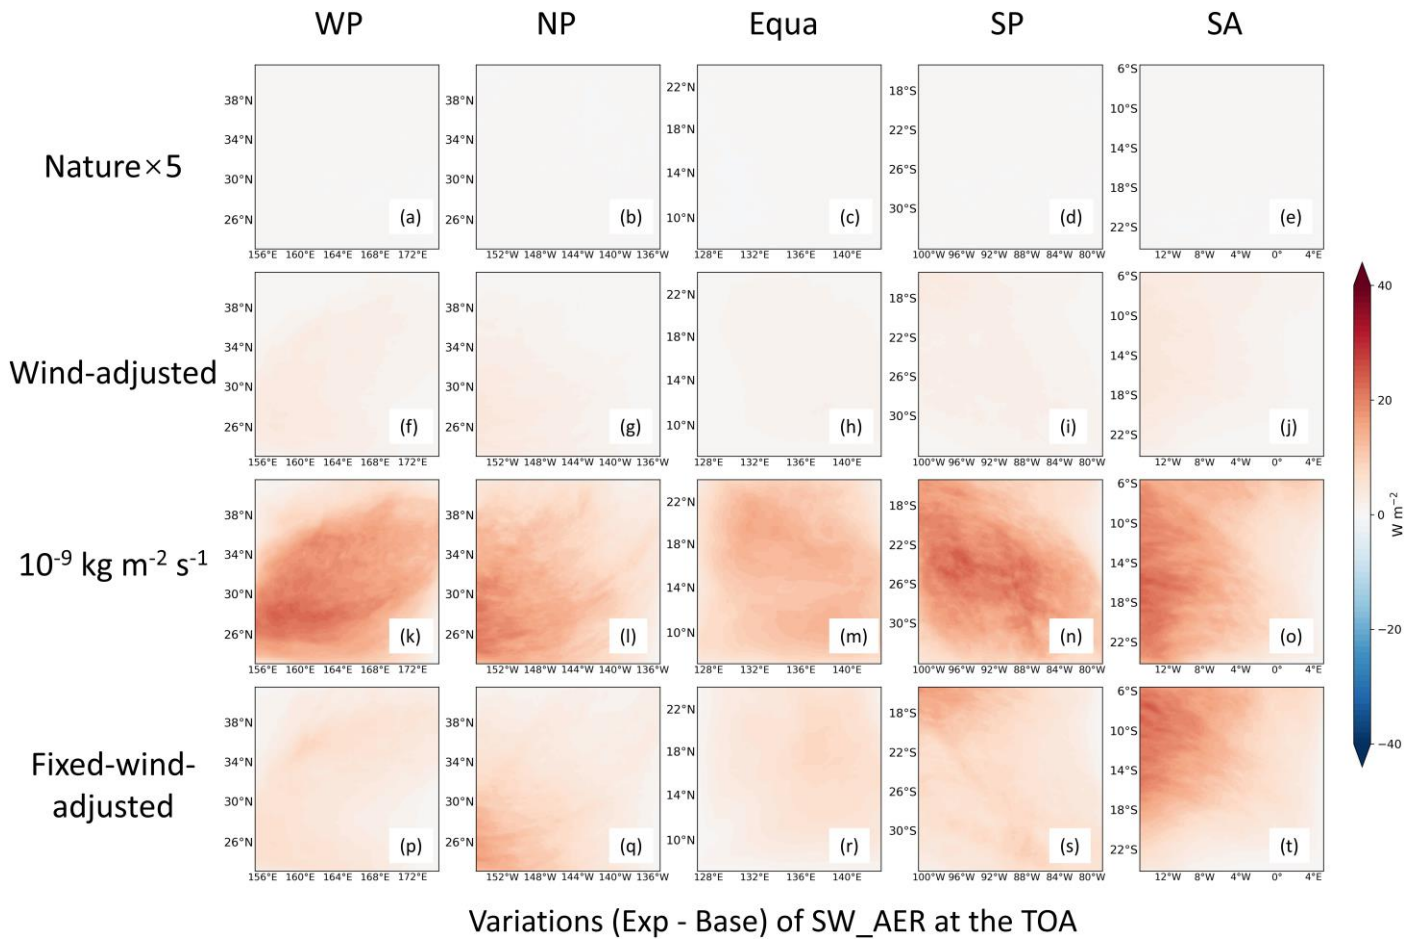

Variations (Exp - Base) of SW\_AER at the TOA

**Figure S6.** Same caption as Fig. S2, but for the results of SW\_AER ( $\text{W m}^{-2}$ ).

87  
88  
89

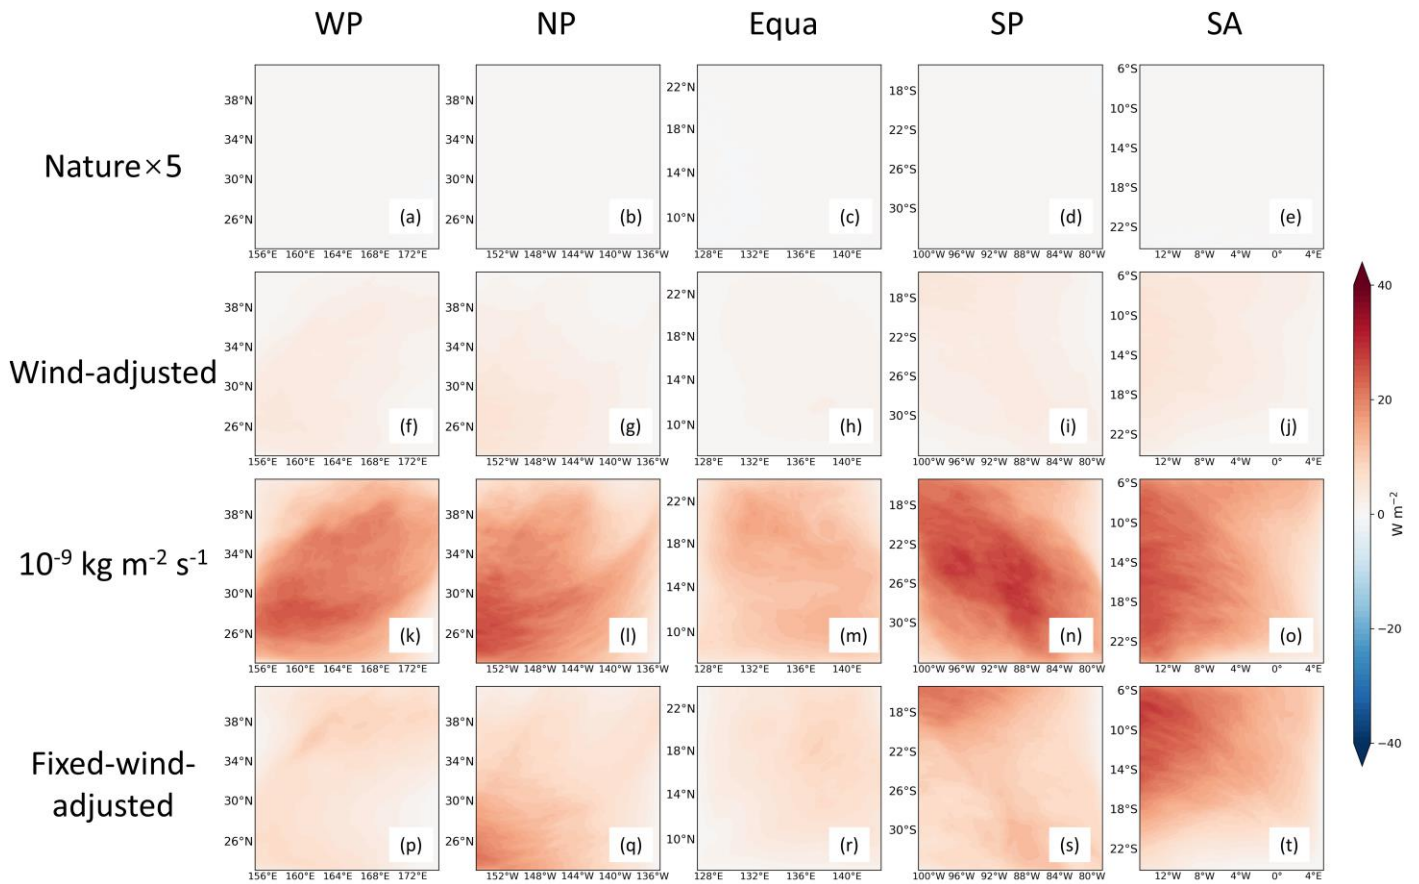

Variations (Exp - Base) of SW\_AER\_CLR at the TOA

**Figure S7.** Same caption as Fig. S2, but for the results of SW\_AER\_CLR ( $\text{W m}^{-2}$ ).

90  
91  
92

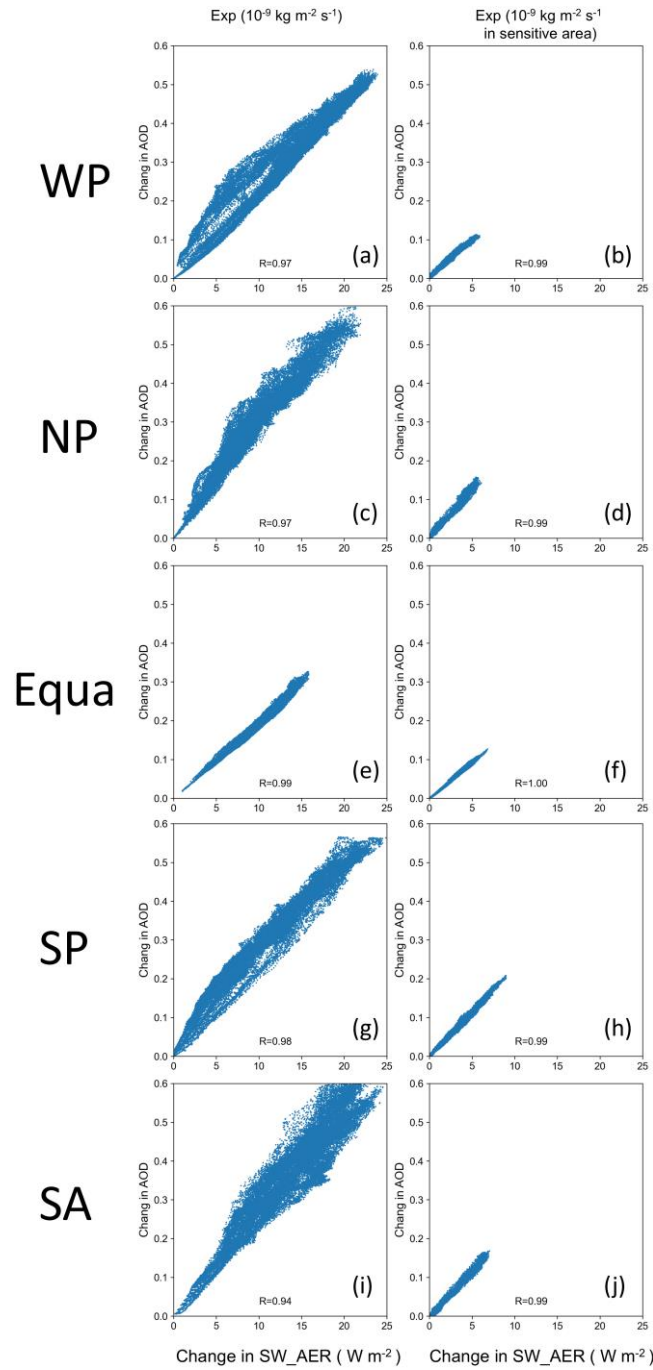

93

94

95

96

**Figure S8.** Relationship between changes in AOD and SW\_AER responses due to uniform injection of  $10^{-9}$   $\text{kg m}^{-2} \text{s}^{-1}$  sea-salt aerosols over the entire region (first column) and injection only within sensitive areas (second column). The Pearson's correlation coefficient (R) is given for each relationship.

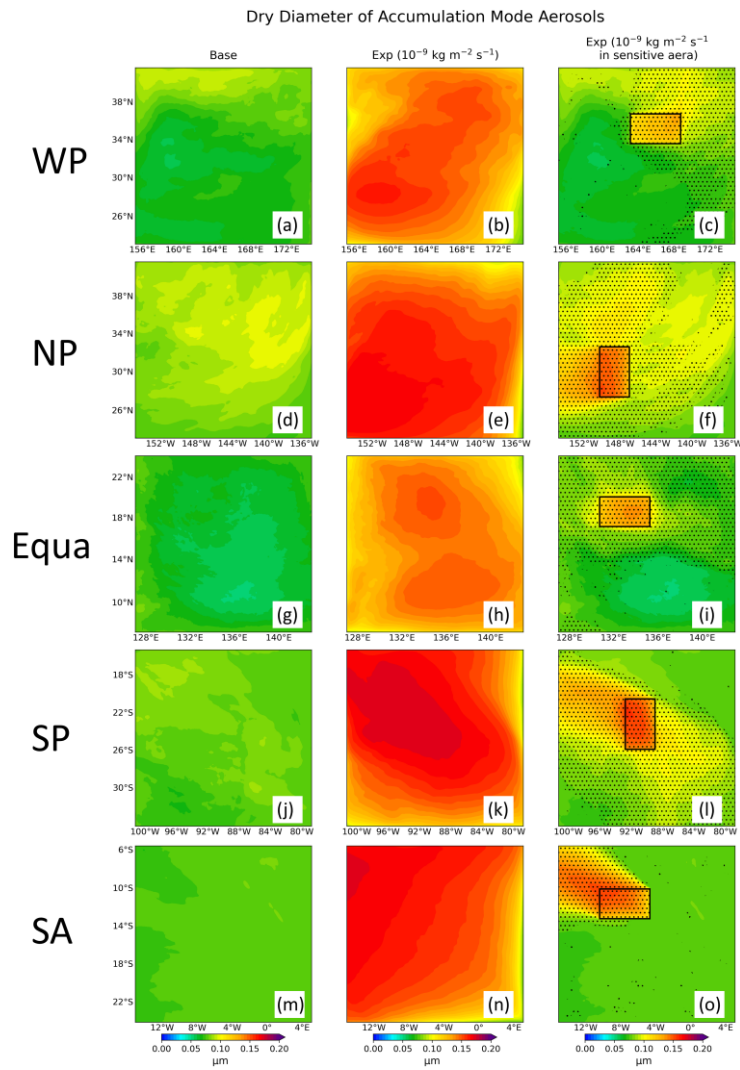

**Figure S9.** Spatial distribution of dry diameter of accumulation mode aerosols for five ocean regions. The first column is for Base, the second is for sensitivity experiments with uniform injections of  $10^{-9} \text{ kg m}^{-2} \text{ s}^{-1}$ , and the third is for sensitivity experiments after uniform injections in sensitive areas. Areas labeled with dots indicate mean differences that are significant at the 95% confidence level. The black rectangles are sensitive areas.

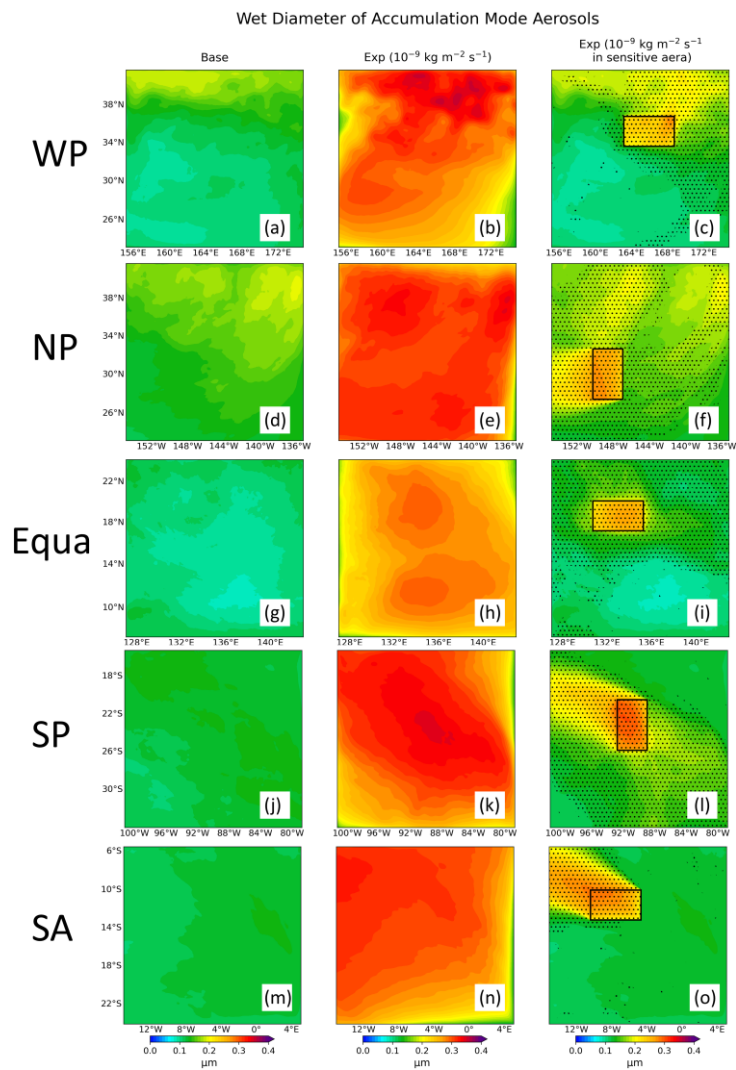

**Figure S10.** Same caption as Fig. S9, but for the wet diameter of accumulation mode aerosols.

104  
105  
106

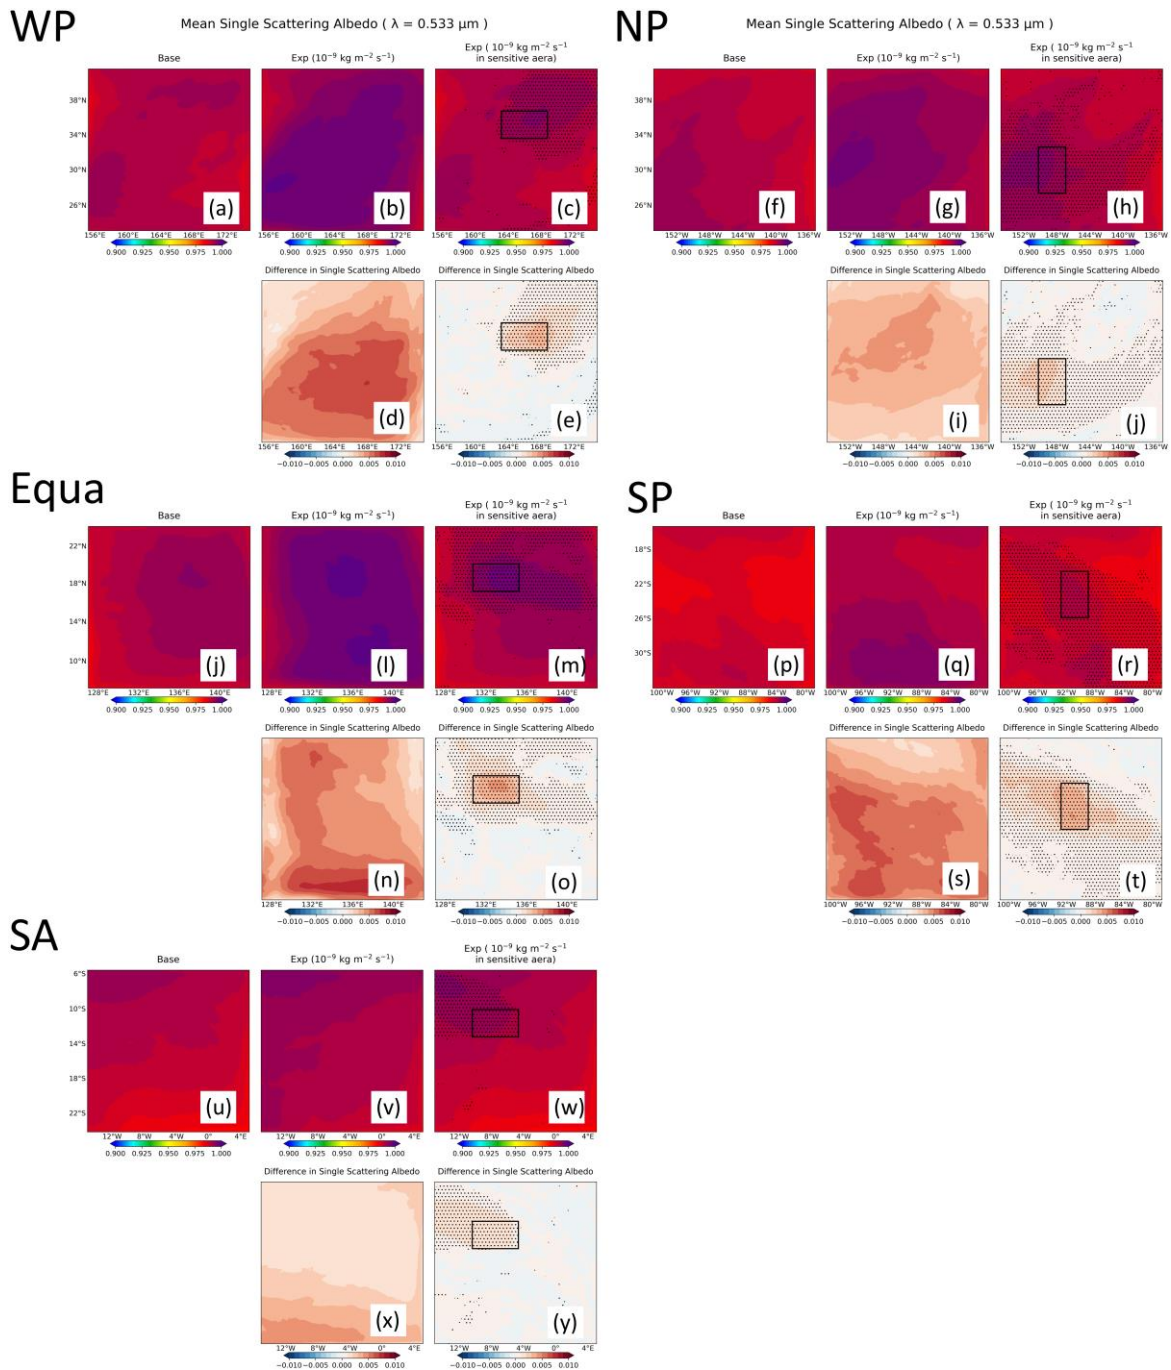

**Figure S11.** Spatial distribution of aerosol single scattering albedo ( $\lambda = 0.533 \mu\text{m}$ ) for Base and sensitivity experiments in five regions. The first row for each region shows the results for Base, the sensitivity experiment with a uniform injection of  $10^{-9} \text{ kg m}^{-2} \text{ s}^{-1}$ , and the sensitivity experiment with a uniform injection in the sensitive area. The second row shows the difference between the sensitivity experiment and Base (Exp - Base), respectively. Areas labeled with dots indicate mean differences that are significant at the 95% confidence level. The black rectangles are sensitive areas.

107  
108  
109  
110  
111  
112  
113  
114

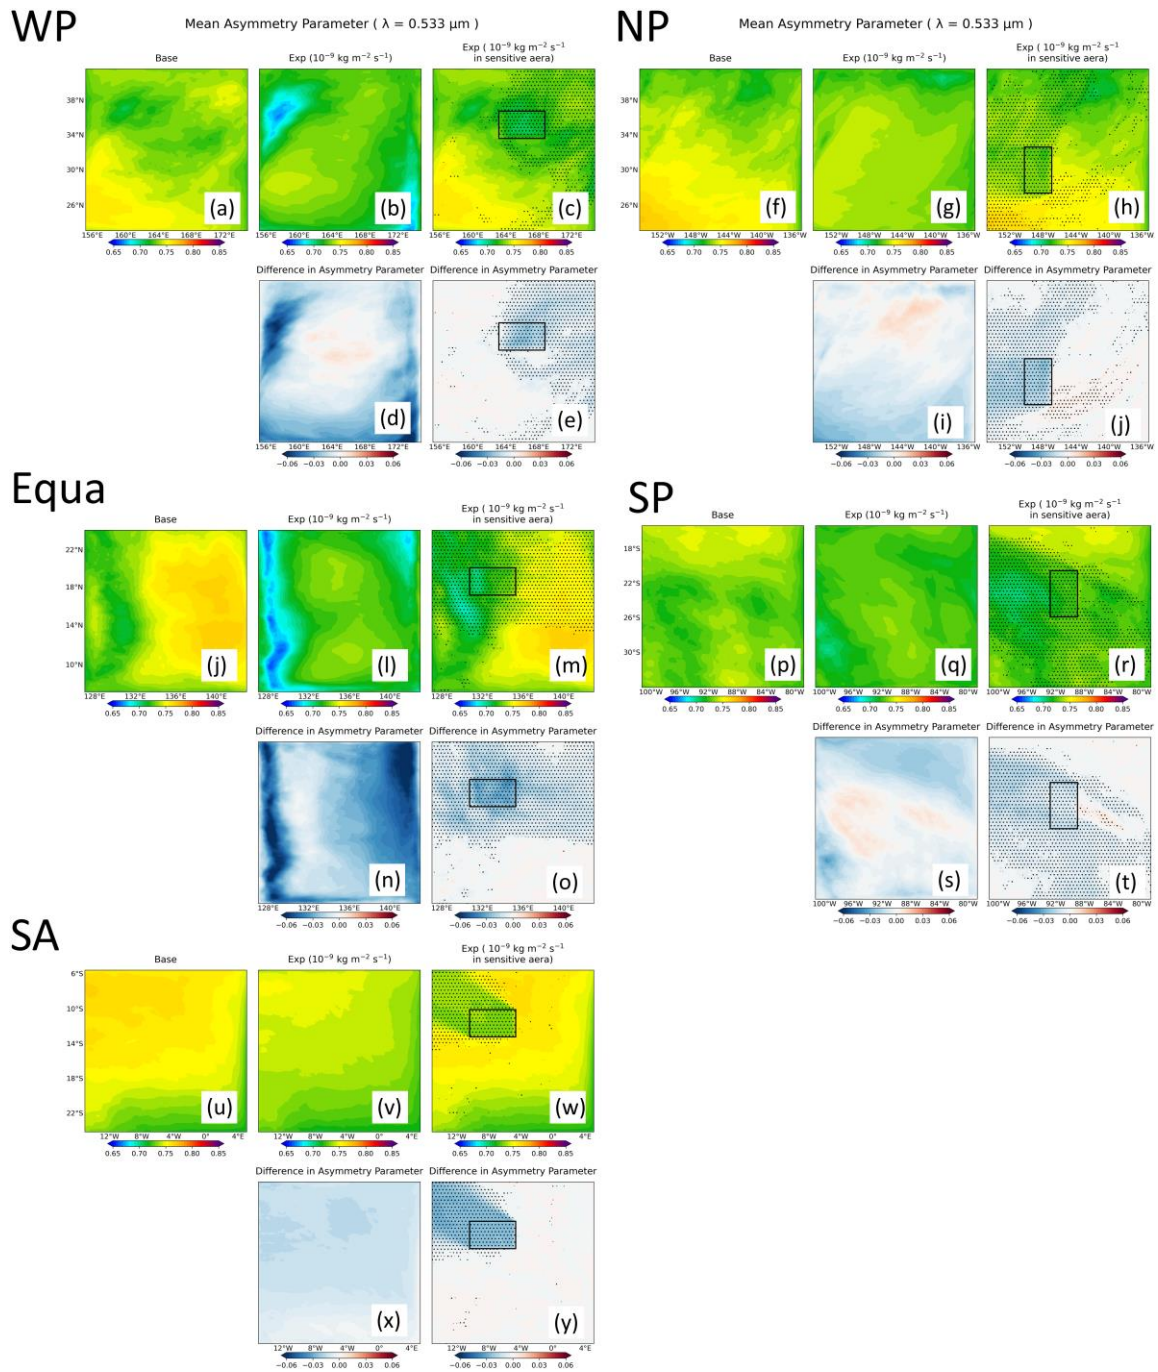

Figure S12. Same caption as Fig. S11, but for the aerosol asymmetry factor.

115  
116  
117

Mean Liquid Cloud Fraction ( from surface to 3000 m )

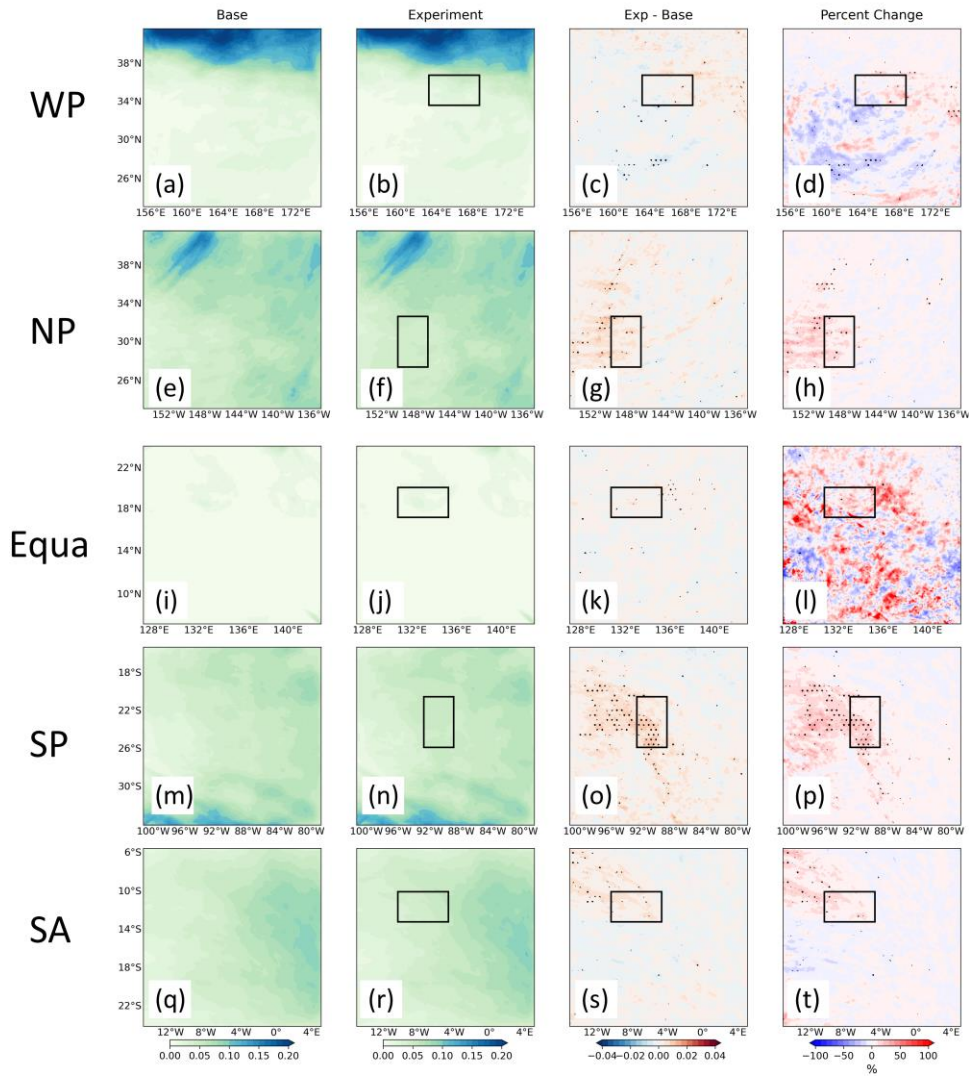

**Figure S13.** Same caption as Fig. 2, but for the sensitivity experiment with a uniform injection of  $10^{-9} \text{ kg m}^{-2} \text{ s}^{-1}$  sea-salt aerosols only in the sensitive area. Areas labeled with dots indicate mean differences that are significant at the 95% confidence level. The black rectangles are sensitive areas.

118  
119  
120  
121  
122



For WP ( $10^{-9} \text{ kg m}^{-2} \text{ s}^{-1}$  injection)

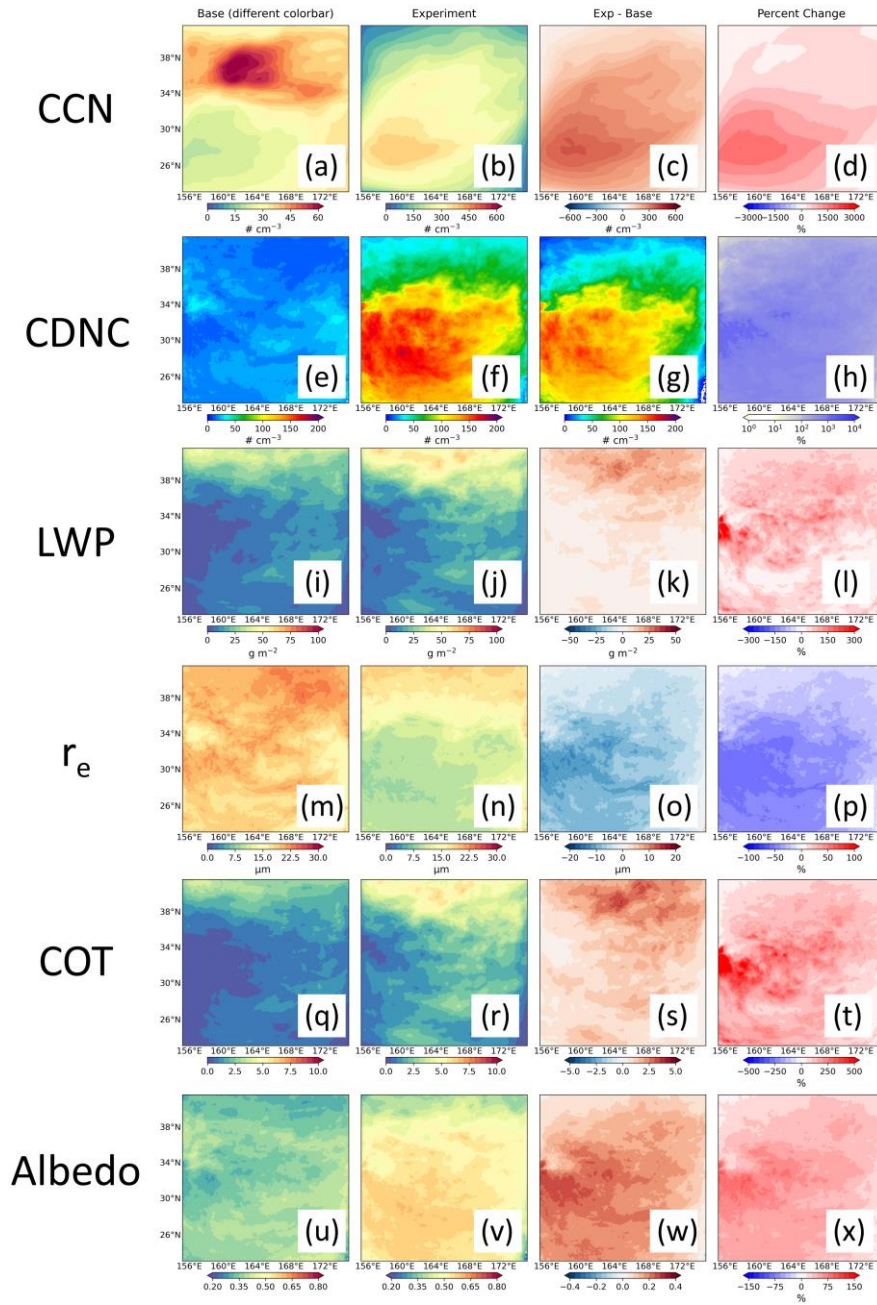

Figure S14. Same caption as Fig. 10, but for the WP region.

123  
124  
125

For NP ( $10^{-9} \text{ kg m}^{-2} \text{ s}^{-1}$  injection)

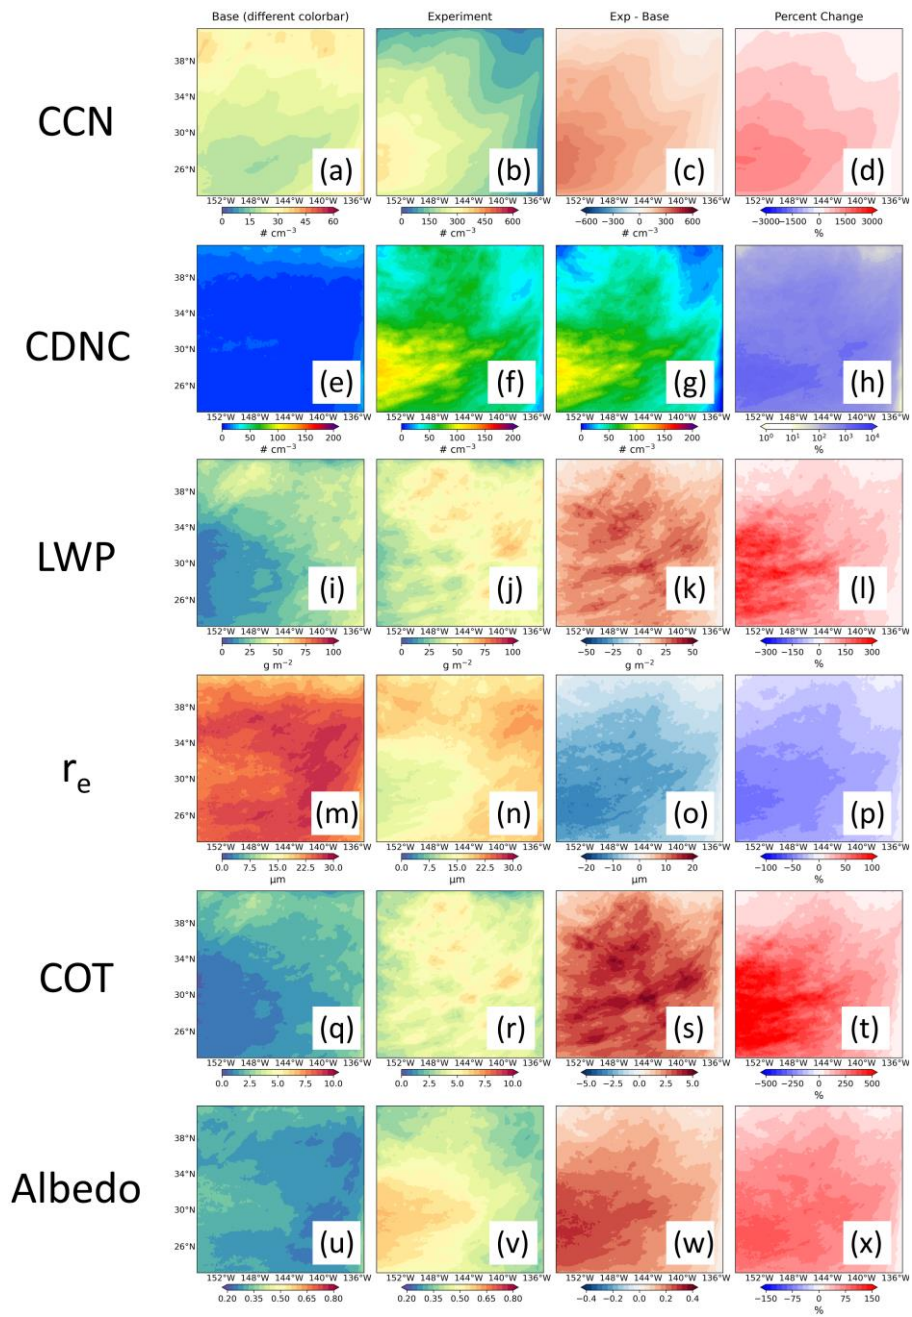

126

127

Figure S15. Same caption as Fig. 10, but for the NP region.

For Equa ( $10^{-9} \text{ kg m}^{-2} \text{ s}^{-1}$  injection)

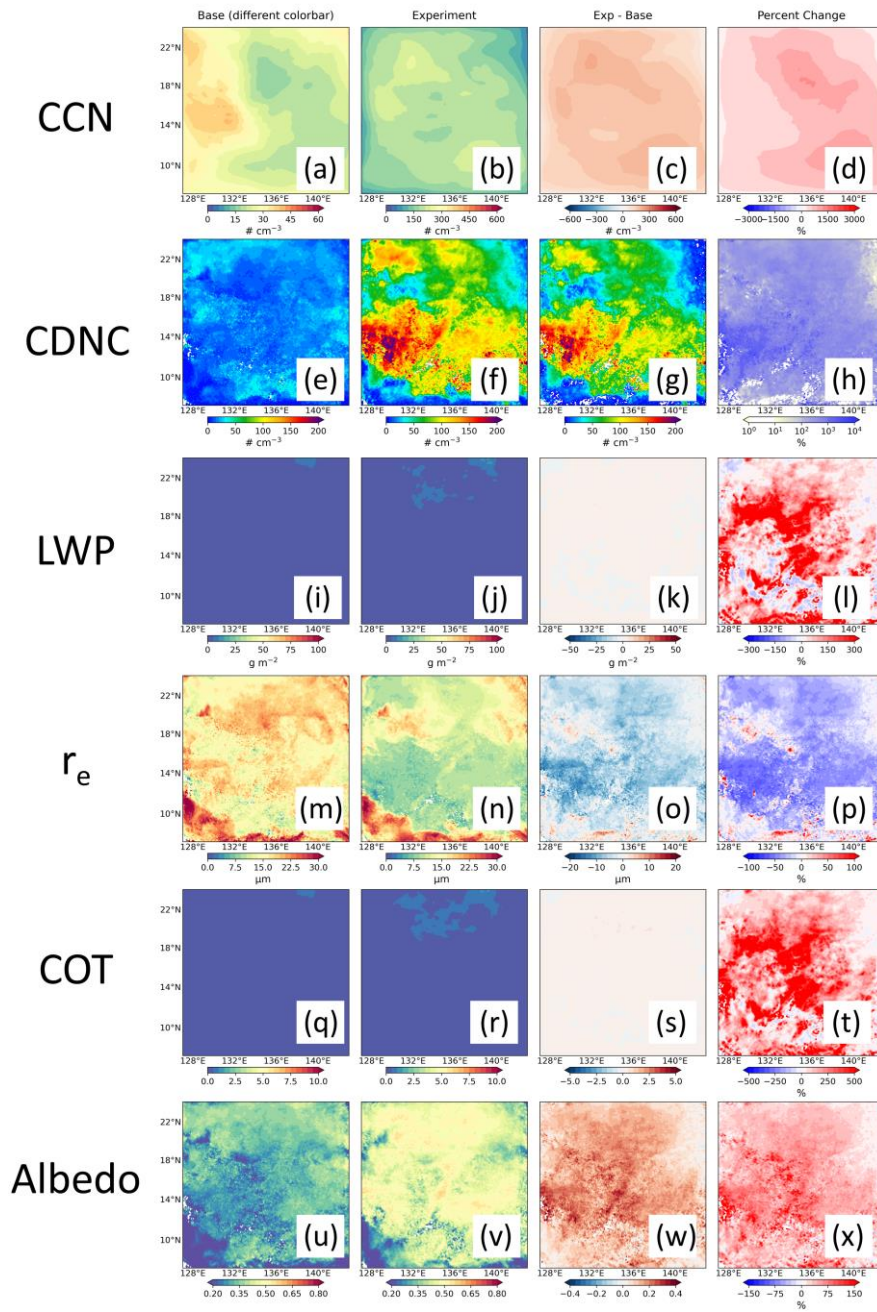

Figure S16. Same caption as Fig. 10, but for the Equa region.

128  
129  
130

For SA ( $10^{-9} \text{ kg m}^{-2} \text{ s}^{-1}$  injection)

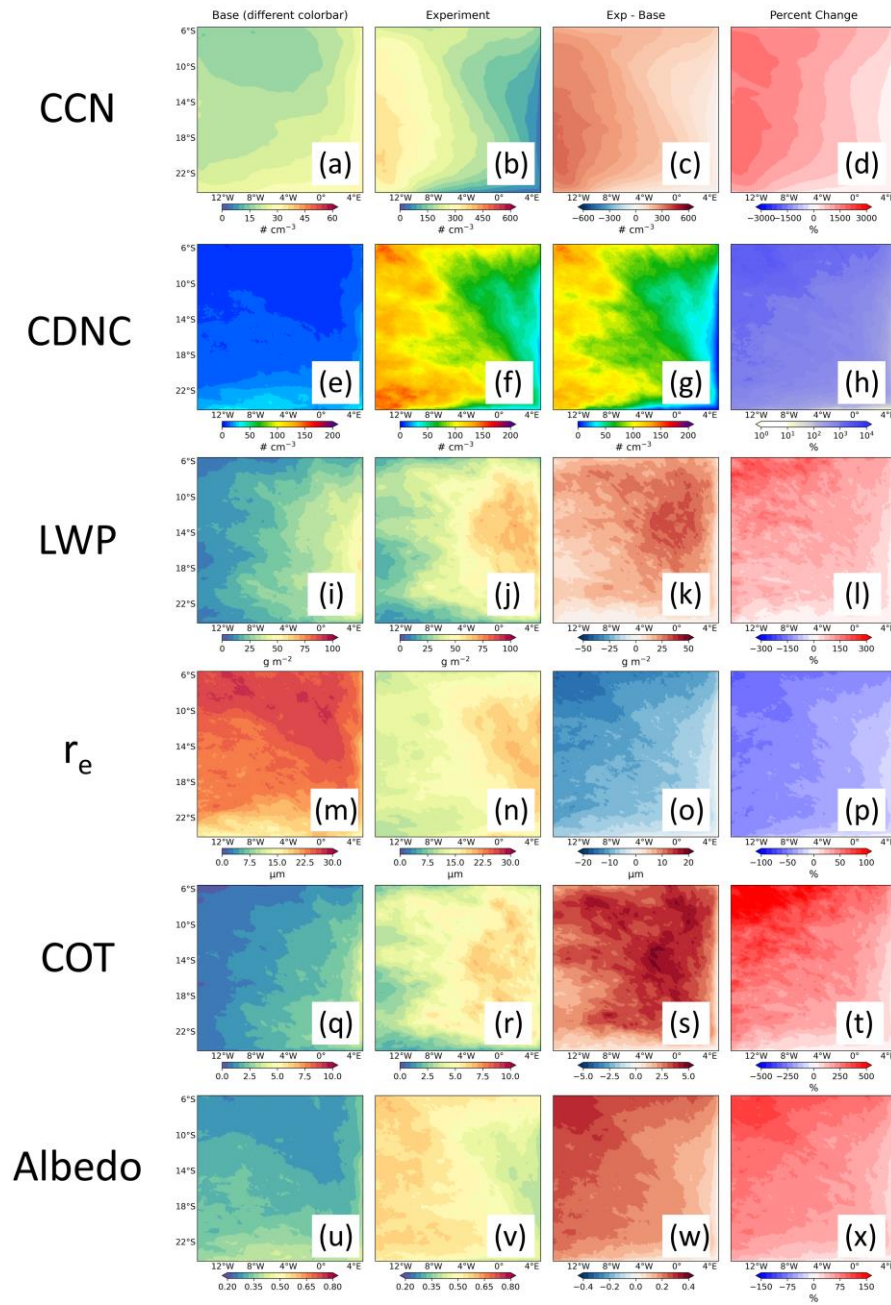

Figure S17. Same caption as Fig. 10, but for the SA region.

131  
132  
133

For SP ( $10^{-9}$  kg m<sup>-2</sup> s<sup>-1</sup> injection in sensitive area)

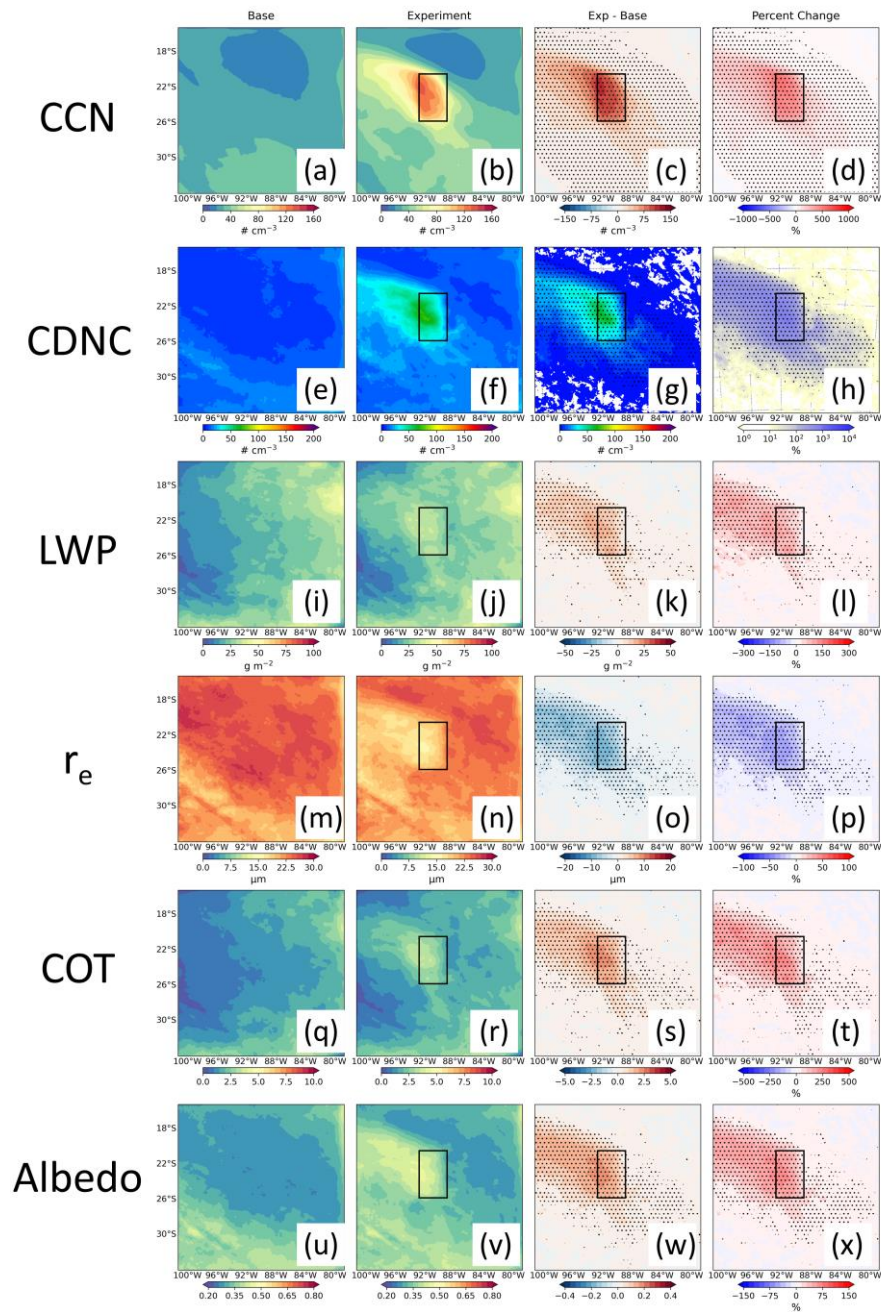

134

135

136

137

**Figure S18.** Same caption as Fig. 10, but showing the spatial distribution of the liquid cloud property response to a uniform injection of sea-salt aerosols within the sensitive area in the SP. Areas labeled with dots indicate mean differences that are significant at the 95% confidence level. The black rectangles are the sensitive areas.

For WP ( $10^{-9}$  kg m<sup>-2</sup> s<sup>-1</sup> injection in sensitive area)

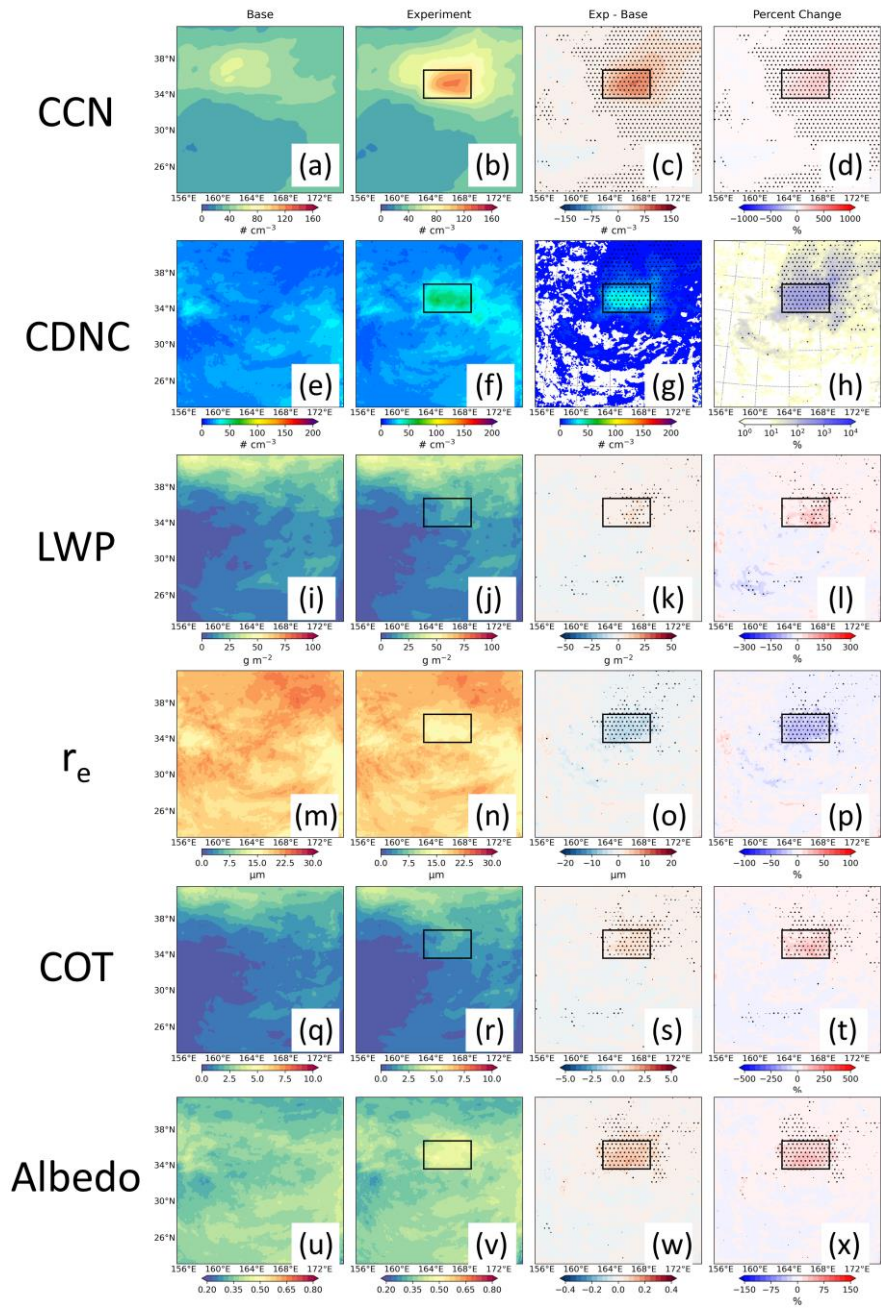

Figure S19. Same caption as Fig. S18, but for the WP region.

138  
139  
140

For NP ( $10^{-9}$  kg m $^{-2}$  s $^{-1}$  injection in sensitive area)

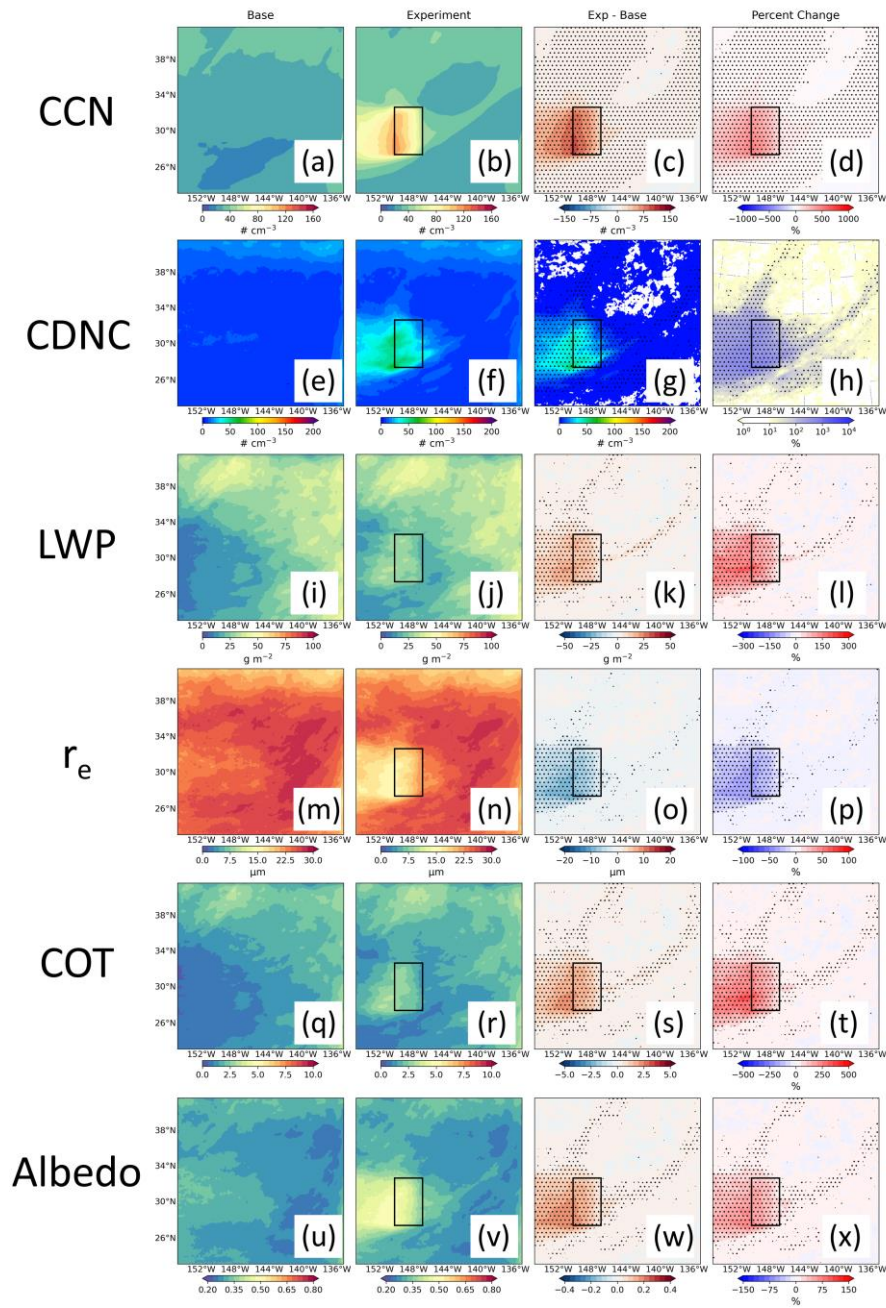

Figure S20. Same caption as Fig. S18, but for the NP region.

141  
142  
143

For Equa ( $10^{-9} \text{ kg m}^{-2} \text{ s}^{-1}$  injection in sensitive area)

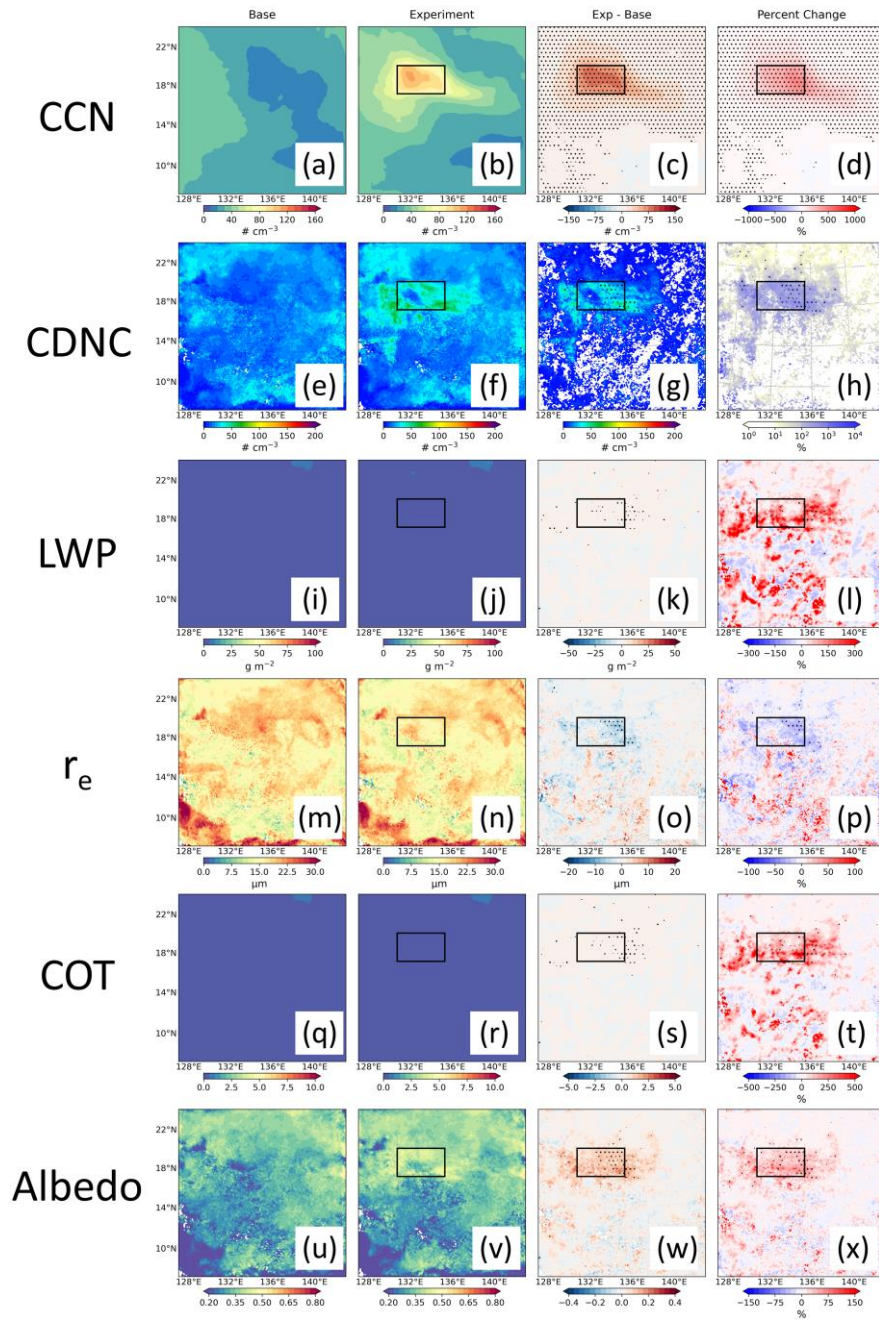

Figure S21. Same caption as Fig. S18, but for the Equa region.

144  
145  
146



For SA ( $10^{-9}$  kg m<sup>-2</sup> s<sup>-1</sup> injection in sensitive area)

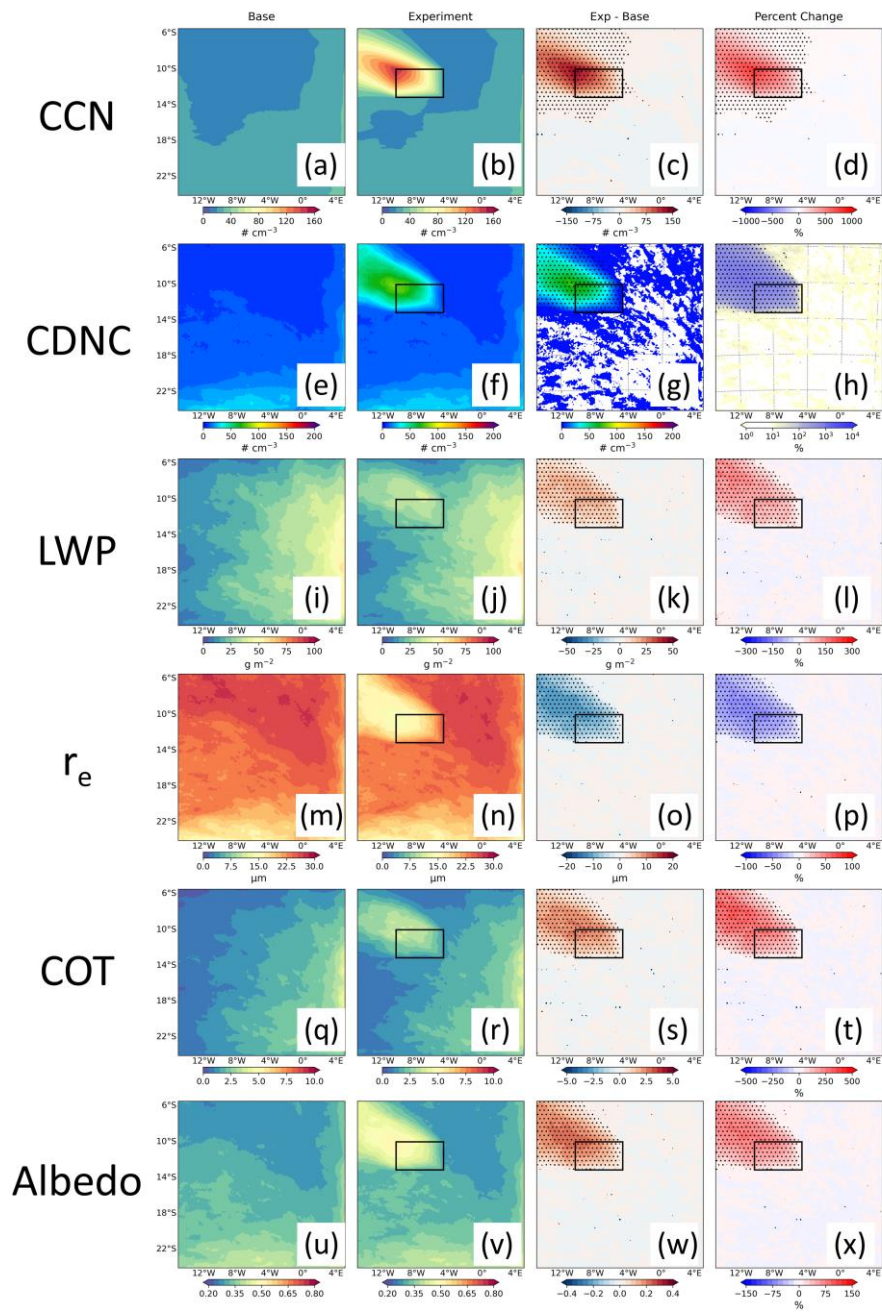

Figure S22. Same caption as Fig. S19, but for the SA region.

147  
148  
149

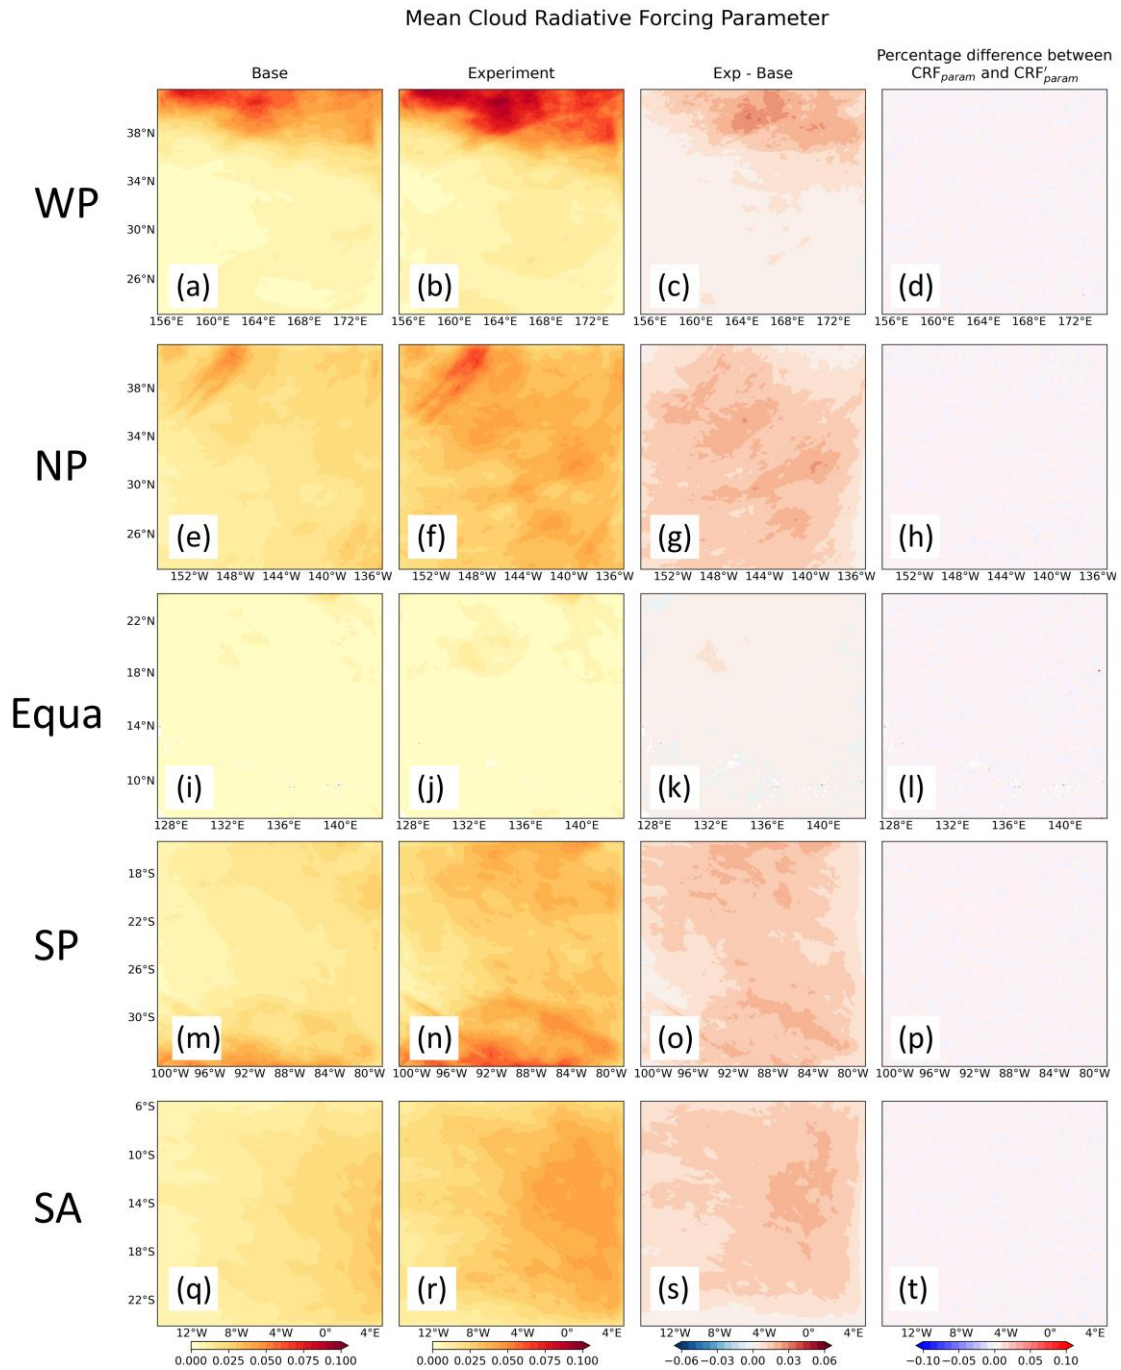

**Figure S23.** The cloud radiative forcing (CRF) parameters after injection of sea-salt aerosols in the five regions. The first to fourth columns are Base, the sensitivity experiment with a uniform injection of  $10^{-9} \text{ kg m}^{-2} \text{ s}^{-1}$  sea-salt aerosols over the entire region, Exp - Base, and the  $CRF'_{param}$  approximated by the perturbation method, respectively.

Mean Cloud Radiative Forcing Parameter

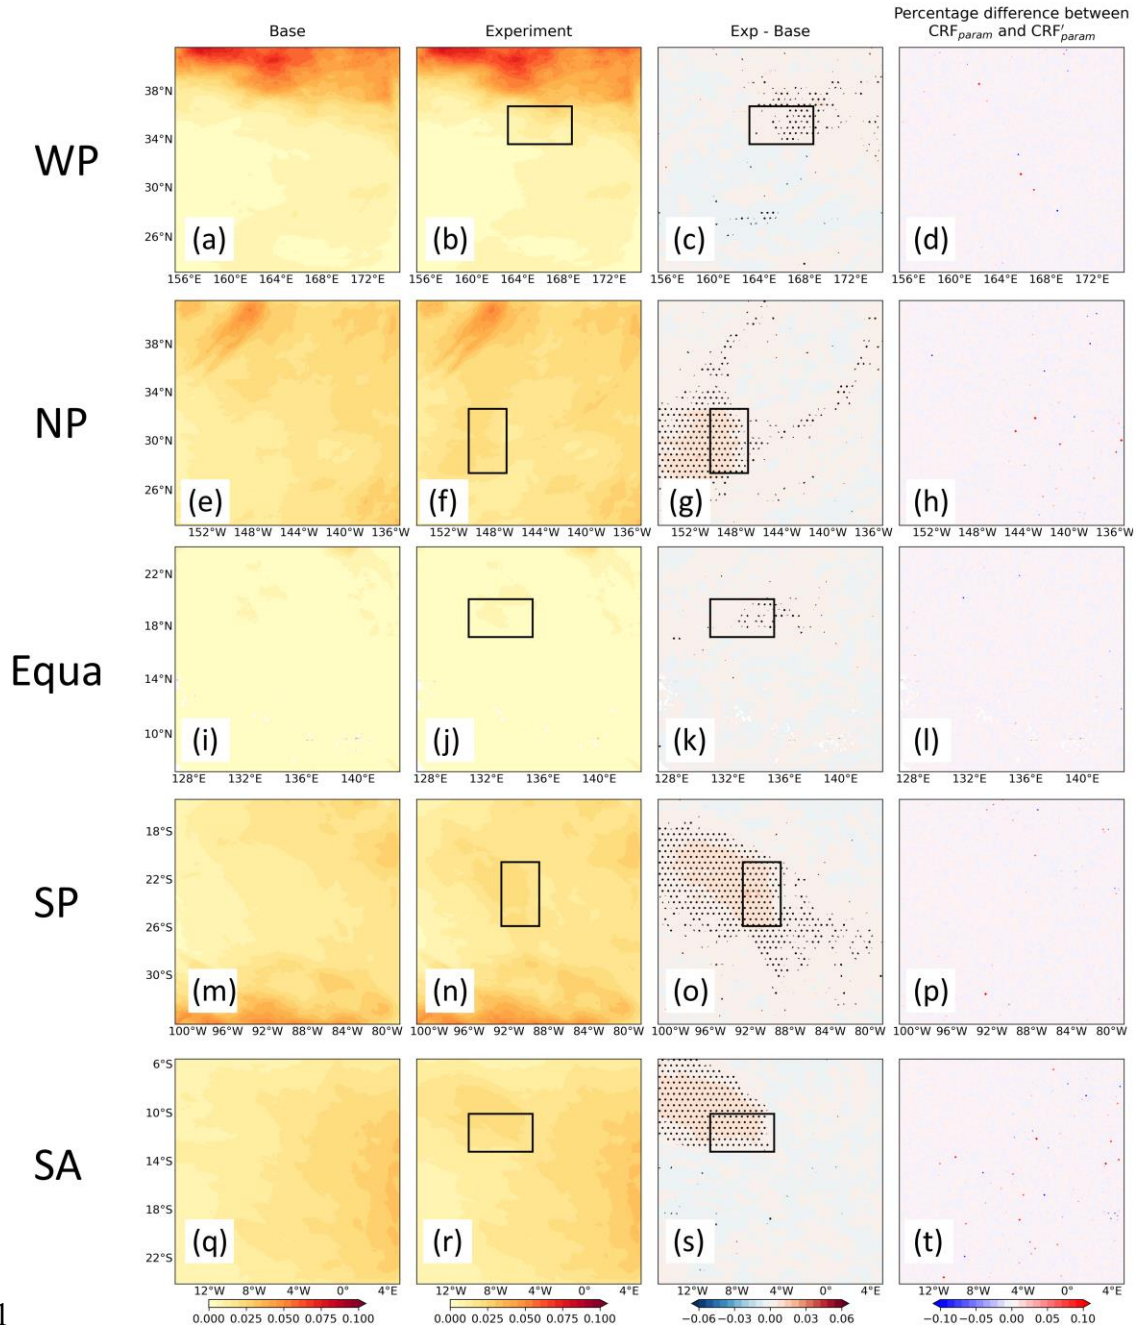

**Figure S24.** Same caption as Fig. S23, but for the sensitivity experiment with a uniform injection of  $10^{-9}$   $\text{kg m}^{-2} \text{s}^{-1}$  sea-salt aerosols only in the sensitive area. Areas labeled with dots indicate mean differences that are significant at the 95% confidence level. The black rectangles are sensitive areas.

156  
157  
158  
159  
160

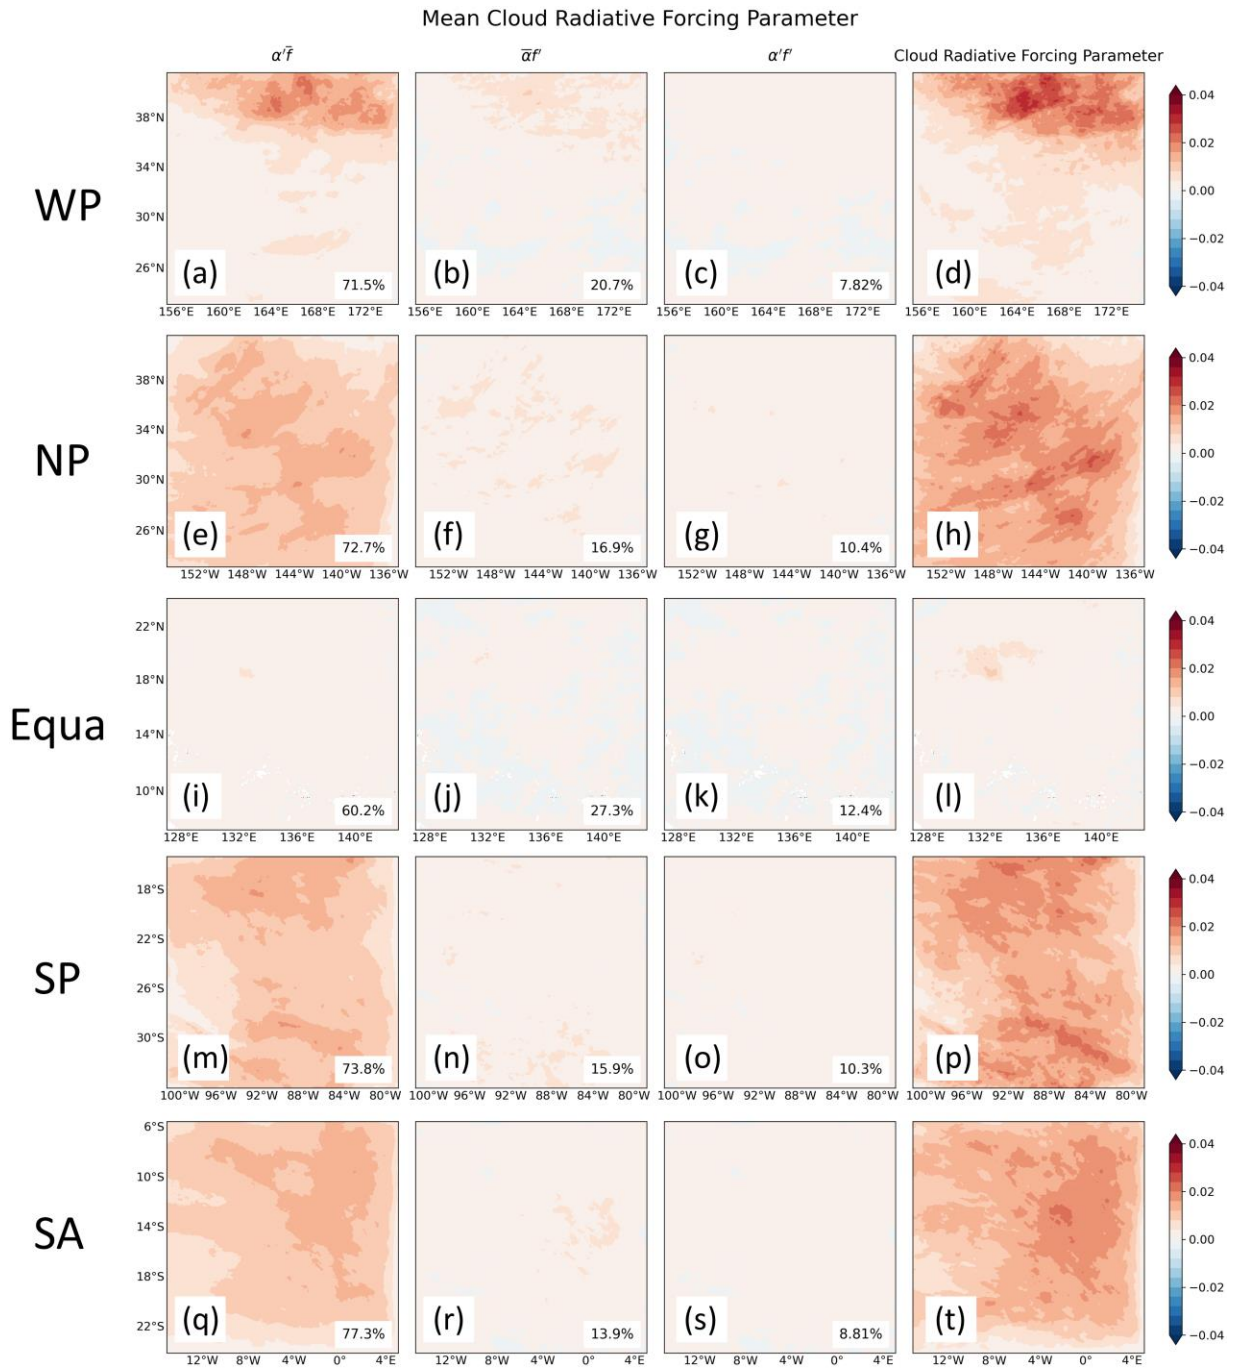

161  
 162 **Figure S25.** The three additive perturbation terms of the  $\text{CRF}'_{param}$  after uniform injection of sea-salt aerosols  
 163 within the five regions (First column: driven by the perturbation of cloud albedo. Second column: driven by  
 164 the change in cloud fraction. Third column: jointly driven by the interaction of the two.), as well as the  
 165  $\text{CRF}'_{param}$  approximated using the perturbation method (fourth column, see Equation 6 and 7). The percentage  
 166 contribution of each item to the total  $\text{CRF}'_{param}$  is labeled in the lower right corner for the entire region.  
 167  
 168

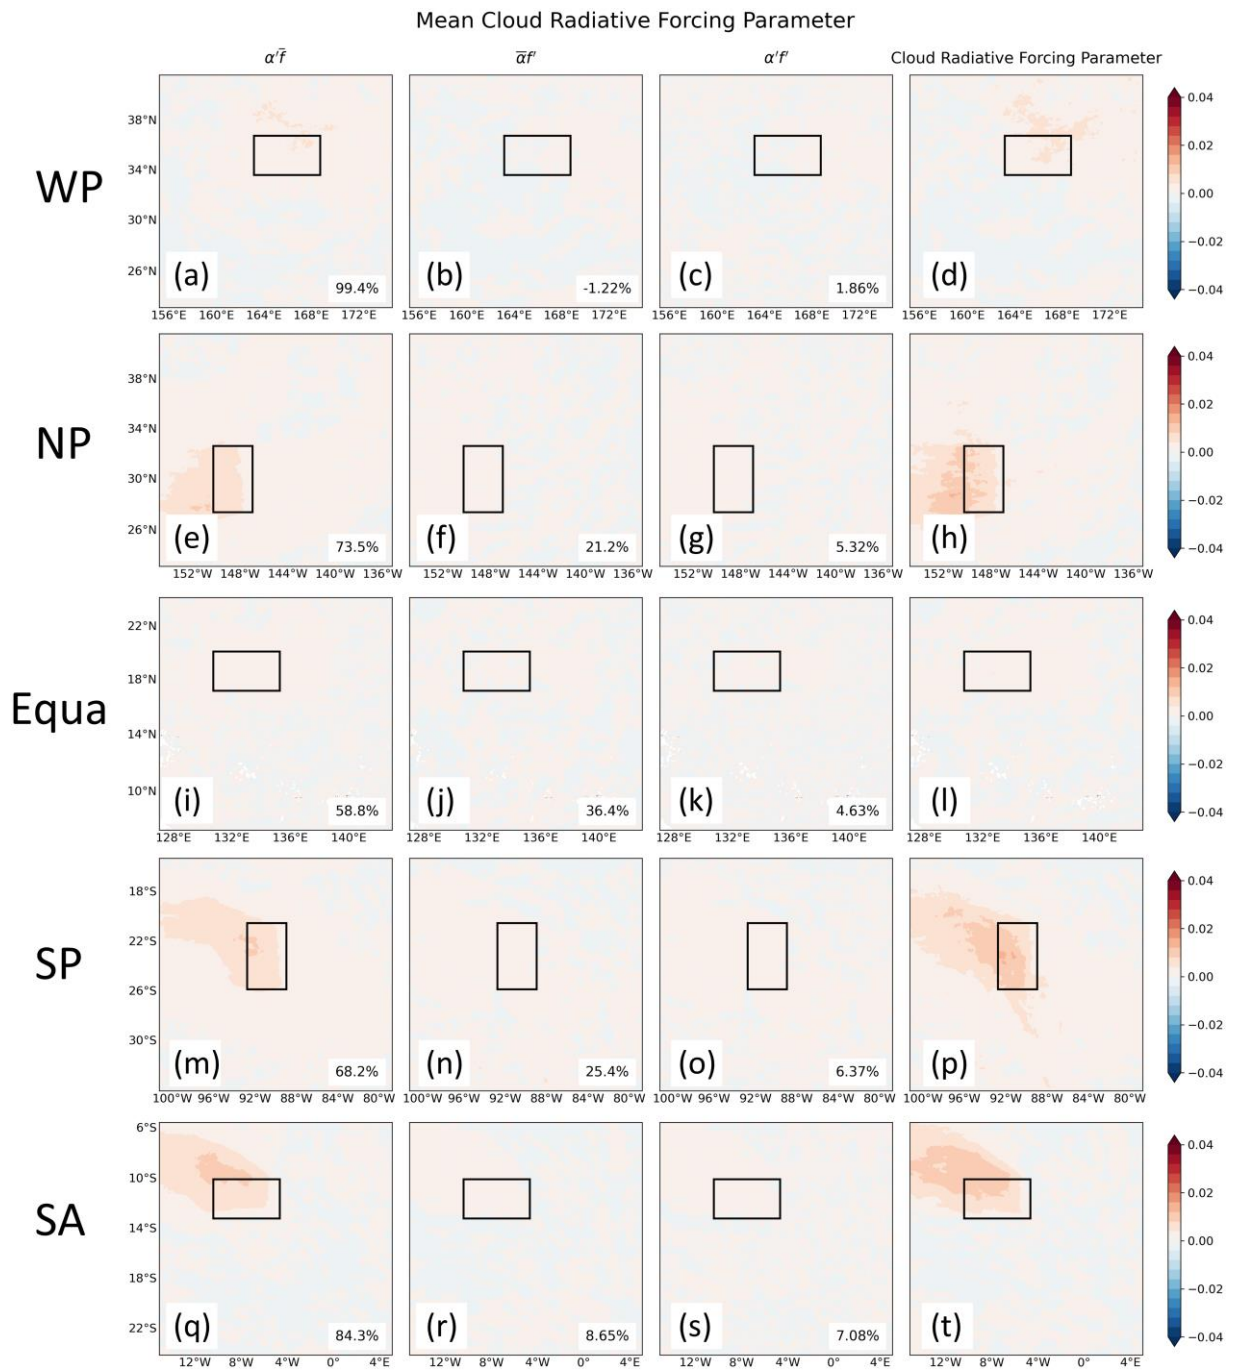

**Figure S26.** Same caption as Fig. S25, but for the sensitivity experiment with a uniform injection of  $10^{-9}$  kg  $m^{-2} s^{-1}$  sea-salt aerosols only in the sensitive area. The black rectangles are sensitive areas.

169  
170  
171  
172

Mean Total Aerosol Radiative Forcing Components - Twomey, LWP, CLDFRA

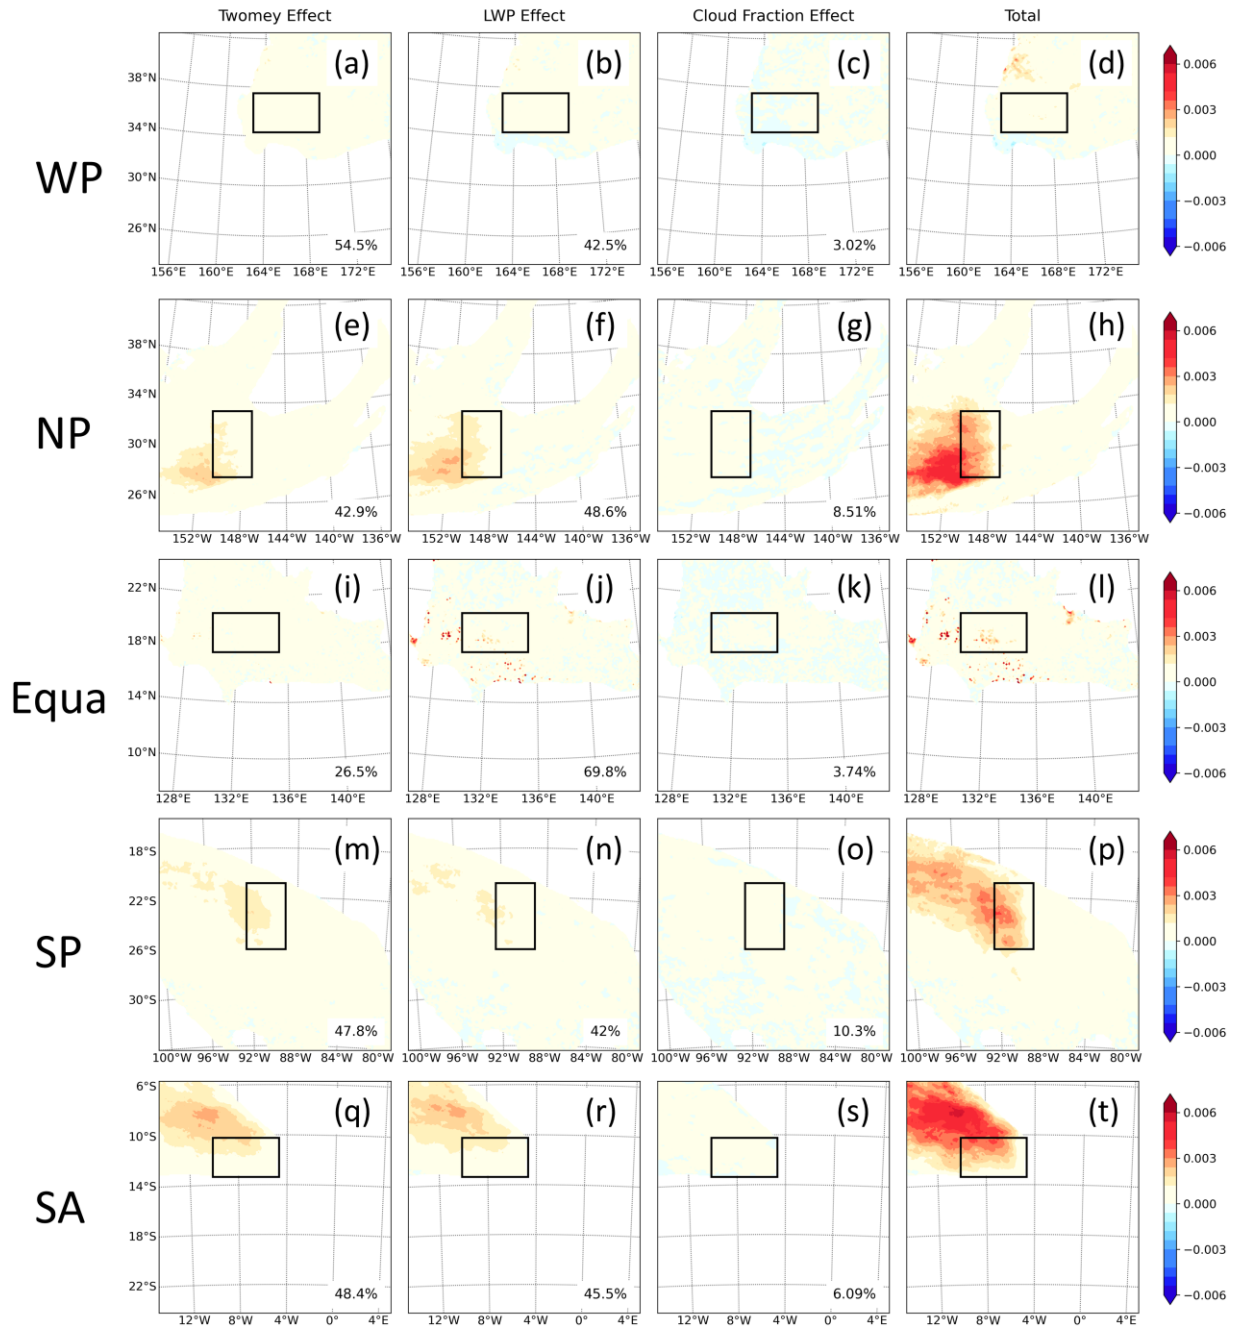

**Figure S27.** Same caption as Fig. 11, but for the sensitivity experiment with a uniform injection of  $10^{-9} \text{ kg m}^{-2} \text{ s}^{-1}$  sea-salt aerosols only in the sensitive area. The black rectangles are sensitive areas.

173  
174  
175  
176

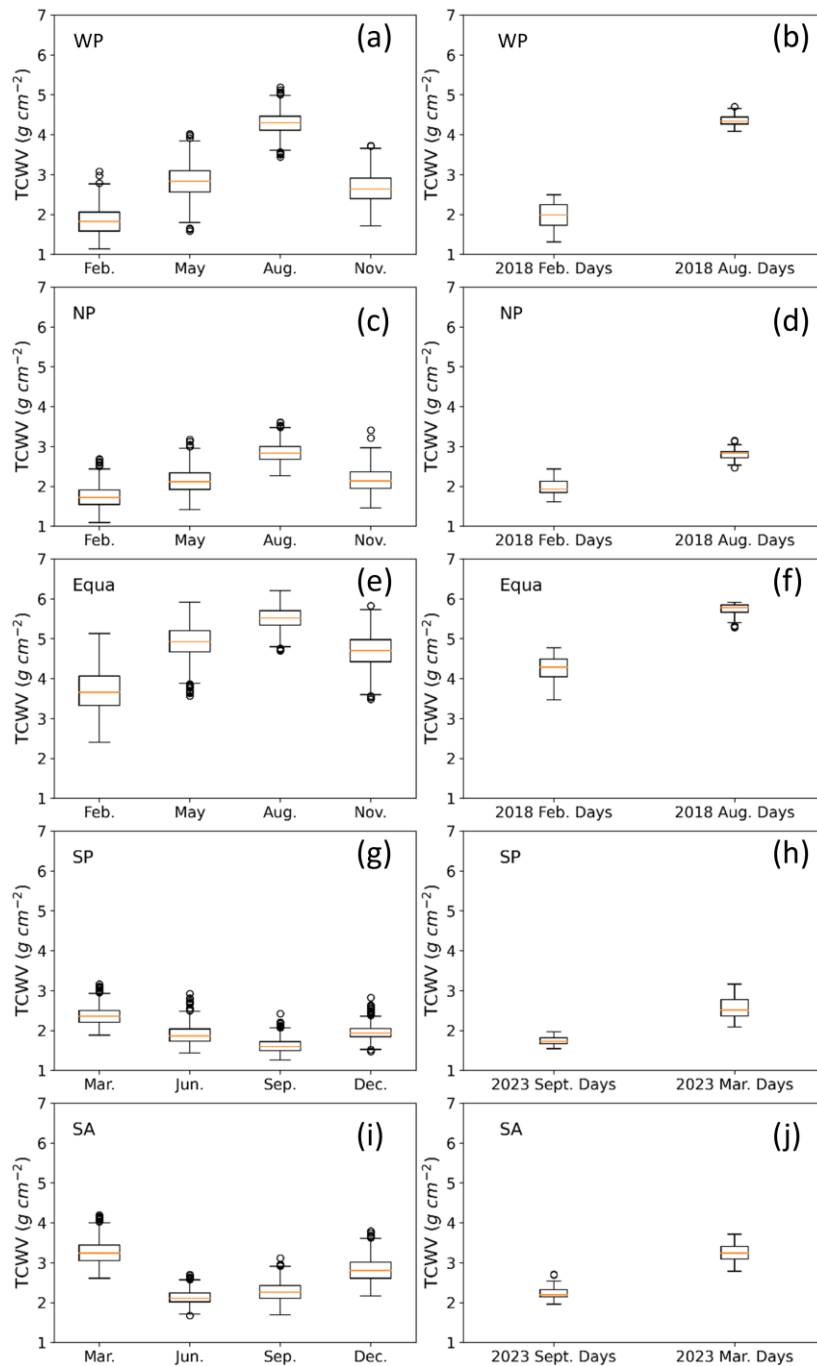

**Figure S28.** Box plots of total column water vapor (TCWV) for the five ocean regions from ERA5. The left column shows daily mean data from ERA5 for the years 1990–2020 (1990–2023 for SP and SA), listed by month. For WP, NP and Equa, each year is wetter in August and drier in February. For SP and SA, March is wetter and September is drier. The right column shows the daily average of the ERA5 data for the simulated (wetter) and dry months of the year. For WP, NP, and Equa, the initial simulation time period was August 2018, which was wetter, so we chose the dry time period of February of the same year to simulate again. SP and SA were initially simulated in March 2023, which was wetter, so we chose the dry time period of September of the same year to simulate again.

177  
178  
179  
180  
181  
182  
183  
184  
185  
186  
187

**Table S1.** Summary of modeling studies on marine cloud brightening (MCB), marine sky brightening (MSB) and injection of sea salt aerosols.

| <b>Models</b>                                                    | <b>Strategies</b>                                                             | <b>Increased emissions</b>                                                                      | <b>Locations</b>                                                                                                                  | <b>References</b>         |
|------------------------------------------------------------------|-------------------------------------------------------------------------------|-------------------------------------------------------------------------------------------------|-----------------------------------------------------------------------------------------------------------------------------------|---------------------------|
|                                                                  | set $N = 400 \text{ cm}^{-3}$                                                 | $10^9$ in mass (NaCl)<br>$10^{26}$ in number of droplets                                        | global                                                                                                                            | (Latham, 2002)            |
| A simplified version of the model of marine stratocumulus clouds | $\Delta N = 10, 30, 100, 300$ and $1000 \text{ cm}^{-3}$                      |                                                                                                 |                                                                                                                                   | (Bower et al., 2006)      |
| HadGAM<br>CAM                                                    | set $N_d = 375 \text{ cm}^{-3}$<br>set $N_d = 375$ and $1000 \text{ cm}^{-3}$ |                                                                                                 | global                                                                                                                            | (Latham et al., 2008)     |
| HadGEM2                                                          | set CDNC = $375 \text{ cm}^{-3}$                                              |                                                                                                 | North Pacific (NP), South Pacific (SP) and South Atlantic (SA)                                                                    | (Jones et al., 2009)      |
| CCSM                                                             | set CDNC = $1000 \text{ cm}^{-3}$                                             |                                                                                                 | 20%, 30%, 40% and 70% of ocean area                                                                                               | (Rasch et al., 2009)      |
| GLOMAP                                                           | set geoengineering particle number flux (GEO and 5GEO) according to U10       |                                                                                                 | off the coast of California (North Pacific), Chile (South Pacific), Namibia (South Atlantic) and Western Australia (Indian Ocean) | (Korhonen et al., 2010)   |
| HadGEM2-AO                                                       | set CDNC = $375 \text{ cm}^{-3}$                                              |                                                                                                 | North Pacific (NP), South Pacific (SP) and South Atlantic (SA)                                                                    | (Jones et al., 2011)      |
| WRF                                                              | inject CCN                                                                    | $1.45 \times 10^6 \text{ m}^{-2} \text{ s}^{-1}$<br>( $375 \text{ cm}^{-3} \text{ hour}^{-1}$ ) |                                                                                                                                   | (Wang et al., 2011)       |
| CAM3.5-CLM3.5                                                    | $r_d$ over the ocean is reduced from 14 to $11.5 \mu\text{m}$                 |                                                                                                 | global                                                                                                                            | (Bala et al., 2011)       |
| NorESM                                                           | increase sea-salt emissions                                                   | $10^{-9} \text{ kg m}^{-2} \text{ s}^{-1}$<br>( $350 \text{ tons s}^{-1}$ )                     | global                                                                                                                            | (Alterskjær et al., 2012) |
| GFDL-CM2G                                                        | set CCN = 500 and $1000 \text{ cm}^{-3}$                                      |                                                                                                 | North Pacific and the Southern Ocean                                                                                              | (Baughman et al., 2012)   |
| HadGEM1                                                          | set CDNC = $375 \text{ cm}^{-3}$                                              |                                                                                                 | global                                                                                                                            | (Gadian, 2012)            |
| AGCM                                                             | increase sea salt aerosols                                                    | fivefold                                                                                        | tropical North Pacific (NP), South Pacific (SP), and South Atlantic (SA)                                                          | (Hill and Ming, 2012)     |
| HadGEM2-ES                                                       | follow Korhonen et al., (2010)                                                | GEO and 5GEO                                                                                    | global and 10% of optimal sea-spray emission areas                                                                                | (Jones and Haywood,       |



|                                               |                                                                |                                                                        |                                                                                          |                                     |
|-----------------------------------------------|----------------------------------------------------------------|------------------------------------------------------------------------|------------------------------------------------------------------------------------------|-------------------------------------|
|                                               |                                                                |                                                                        |                                                                                          | 2012)                               |
| HadGEM1                                       | set CDNC = 375 cm <sup>-3</sup>                                |                                                                        | off the western coasts of California, Peru and Namibia                                   | (Latham et al., 2012a)              |
| HadGEM1                                       | set CDNC = 375 cm <sup>-3</sup>                                |                                                                        | global and off the western coasts of California, Peru, Namibia                           | (Latham et al., 2012b)              |
| ECHAM5.5-HAM2                                 | set geoengineering particle number flux (GEO) according to U10 | 20.6–443.9 Tg yr <sup>-1</sup>                                         | global and North Pacific, South Pacific and South Atlantic (3.3% of the Earth's surface) | (Partanen et al., 2012)             |
| 0-D model<br>GLOMAP-MODE<br>EMAC<br>ECHAM-HAM | follow Korhonen et al., (2010)                                 |                                                                        | global                                                                                   | (Pringle et al., 2012)              |
| HadGEM1                                       | set CDNC = 375 cm <sup>-3</sup>                                |                                                                        | follow Jones et al. (2009)                                                               | (Parkes et al., 2012)               |
| NorESM<br>IPSL-CM5A<br>MPI-ESM                | increase sea salt aerosols<br>use the output of the NorESM     | 266–560 Tg yr <sup>-1</sup>                                            | between 30°S and 30°N                                                                    | (Alterskjær et al., 2013)           |
| NorESM                                        | increase sea salt emissions                                    | 10 <sup>-11</sup> –10 <sup>-8</sup> kg m <sup>-2</sup> s <sup>-1</sup> | between 30°S and 30°N                                                                    | (Alterskjær and Kristjánsson, 2013) |
| WRF-Chem                                      | inject aerosols                                                | 3–15 kg s <sup>-1</sup>                                                | point source injection                                                                   | (Jenkins et al., 2013)              |
| MPI-ESM and NorESM                            | increase sea salt aerosols                                     | 10 <sup>-9</sup> kg m <sup>-2</sup> s <sup>-1</sup>                    | between 30°S and 30°N                                                                    | (Niemeier et al., 2013)             |
| Gaussian plume model<br>LES<br>ECHAM5.5-HAM2  | inject aerosols                                                | 20.6 Tg yr <sup>-1</sup>                                               | North Pacific, South Pacific and South Atlantic                                          | (Stuart et al., 2013)               |
| HadGEM2-ES                                    | 50% increase in CDNC<br>increase sea salt aerosols             | 100–400 Tg yr <sup>-1</sup>                                            | global<br>between 30°S and 30°N                                                          | (Kravitz et al., 2013)              |
| Lagrangian Cloud Model                        | inject aerosols                                                | 100, 200, 400, 800 cm <sup>-3</sup>                                    |                                                                                          | (Andrejczuk et al., 2014)           |
| ACPIM                                         | inject aerosols                                                | NaCl mixing ratios= 10 <sup>-14</sup> –                                |                                                                                          | (Connolly et                        |

|                                                   |                                                             |                                                                                  |                                                                          |                         |
|---------------------------------------------------|-------------------------------------------------------------|----------------------------------------------------------------------------------|--------------------------------------------------------------------------|-------------------------|
|                                                   |                                                             | $10^{-4} \text{ kg kg}^{-1}$                                                     |                                                                          | al., 2014)              |
| cloud-resolving model (WRF)                       | inject CCN                                                  | $1.45 \times 10^6 \text{ m}^{-2} \text{ s}^{-1}$                                 | single moving<br>point source injection<br>(Arctic, 71.32°N, 156.61°W)   | (Kravitz et al., 2014)  |
| UCLALES                                           | Inject particles                                            | $15 \text{ kg s}^{-1}$                                                           |                                                                          | (Maalick et al., 2014)  |
| HadGEM1                                           | set CDNC = $375 \text{ cm}^{-3}$                            |                                                                                  | Antarctic, off the West coasts of North and South America, and Africa    | (Latham et al., 2014)   |
| HadGEM2                                           | increase sea salt aerosols                                  | $1.8 \times 10^8 \text{ m}^{-3}$                                                 | between 30°S and 30°N                                                    | (Crook et al., 2015)    |
| HadGEM1<br>GLAM                                   | set CDNC = $375 \text{ cm}^{-3}$                            |                                                                                  | off the western coasts of California, Peru and Namibia                   | (Parkes et al., 2015)   |
| NorESM1-M<br>IPSL-CM5A-LR<br>MPI-ESM-LR           | increase sea salt aerosols<br>use the output of the NorESM  |                                                                                  | between 30°S and 30°N                                                    | (Muri et al., 2015)     |
| MPI-ESM<br>NorESM<br>IPSL-CM5                     | follow Alterskjær et al. (2013) and Muri et al. (2015)      |                                                                                  | between 30°S and 30°N                                                    | (Aswathy et al., 2015)  |
| UVic ESCM<br>ECHAM5.5-HAM2                        | use the radiative forcing from Partanen et al. (2012)       |                                                                                  | off the west coasts of North America, South America, and Southern Africa | (Partanen et al., 2016) |
| LMDZ5B                                            | prescribe an additional concentration sea salt              |                                                                                  | between 30°S and 30°N                                                    | (Boucher et al., 2017)  |
| NorESM1-M<br>GISS-E2-R<br>HadGEM2-ES              | inject sea salt particles                                   | $250 \text{ Tg yr}^{-1}$<br>$590 \text{ Tg yr}^{-1}$<br>$200 \text{ Tg yr}^{-1}$ | between 30°S and 30°N                                                    | (Ahlm et al., 2017)     |
| CESM                                              | $r_d$ over the ocean is reduced from 14 to $11 \mu\text{m}$ |                                                                                  | global                                                                   | (Duan et al., 2018)     |
| NorESM1-ME                                        | increase sea salt emissions                                 | $460 \text{ Tg yr}^{-1}$                                                         | between 45°S and 45°N                                                    | (Muri et al., 2018)     |
| BNU-ESM<br>CanESM2<br>CSIRO-Mk3L-1-2<br>GISS-E2-R | set CDNC = $375 \text{ cm}^{-3}$                            |                                                                                  | global                                                                   | (Stjern et al., 2018)   |

|                                                                            |                                                           |                                                                                                |                                         |                               |
|----------------------------------------------------------------------------|-----------------------------------------------------------|------------------------------------------------------------------------------------------------|-----------------------------------------|-------------------------------|
| HadGEM2-ES<br>IPSL-CM5A-LR<br>MIROC-ESM<br>MPI-ESM1-LR<br>NorESM1-M        |                                                           |                                                                                                |                                         |                               |
| BNU-ESM<br>CanESM2<br>CSIRO-Mk31-1-2<br>HadGem2-ES<br>MIROC-ESM            | set CDNC = 375 cm <sup>3</sup>                            |                                                                                                | global                                  | (Kim et al., 2020)            |
| GEOS-Chem                                                                  | inject sea salt particles                                 | 212–569 Tg yr <sup>-1</sup><br>(3.0–8.0×10 <sup>-12</sup> kg m <sup>-2</sup> s <sup>-1</sup> ) | between 30°S and 30°N                   | (Horowitz et al., 2020)       |
| LCM<br>LES<br>parcel model                                                 | inject spray droplets                                     | 1.2–18374.9 mg <sup>-1</sup>                                                                   |                                         | (Hoffmann and Feingold, 2021) |
| simple heuristic model                                                     | inject sea salt particles                                 | 50–70 Tg yr <sup>-1</sup>                                                                      | 54 % of the Earth's surface             | (Wood, 2021)                  |
| HadGEM2-ES                                                                 | 50% increase in CDNC                                      |                                                                                                | the Sahara-Sahel-Arabian Peninsula zone | (Zhu et al., 2021)            |
| CESM                                                                       | r <sub>d</sub> over the ocean is reduced from 14 to 11 μm |                                                                                                | global                                  | (Zhao et al., 2021)           |
| BNU-ESM<br>CanESM2<br>HadGEM2-ES<br>ISPL-CM5A-LR<br>MIROC-ESM<br>NorESM1-M | 50% increase in CDNC                                      |                                                                                                | global                                  | (Xie et al., 2022)            |
| WRF-Chem                                                                   | inject sea salt particles                                 | 10.8 Tg yr <sup>-1</sup>                                                                       | Gulf of Mexico                          | (Goddard et al., 2022)        |
| GFDL-AM4                                                                   | increase sea salt emissions                               | 7.66×10 <sup>-11</sup> kg m <sup>-2</sup> s <sup>-1</sup><br>(456 Tg yr <sup>-1</sup> )        | between 30°S and 30°N                   | (Mahfouz et al., 2023)        |
| LCM                                                                        | inject aerosols                                           | 1 μg kg <sup>-1</sup> of air                                                                   | 25°N, 120°W                             | (Prabhakaran                  |

|        |                           |                         |                                                                                                                                                                                     |                        |
|--------|---------------------------|-------------------------|-------------------------------------------------------------------------------------------------------------------------------------------------------------------------------------|------------------------|
| LES    |                           |                         |                                                                                                                                                                                     | et al., 2023)          |
| UKESM1 | modify sea salt emissions | 413 Tg yr <sup>-1</sup> | NP (north Pacific: 30°–50°N, 170°–240°E), NEP (north-east Pacific: 0°–30°N, 210°–250°E), SEP (south-east Pacific: 0°–30°S, 250°–290°E) and SP (south Pacific: 30°–50°S, 190°–270°E) | (Haywood et al., 2023) |

Note: Some studies included multiple sensitivity experiments with aerosol injection, and only representative experiments may be listed in the table.

**Table S2.** The total upward shortwave radiation flux (SW\_TOT) at the TOA and the corresponding sea-salt aerosol injections resulting from different strategies of injecting sea-salt aerosols in five areas, and the MCB efficiency ( $E_{\text{MCB}}$ ).

| Strategies                                                         | Areas | SW_TOT<br>(W m <sup>-2</sup> ) | Add Sea-salt aerosols<br>( $\times 10^{-9}$ kg m <sup>-2</sup> s <sup>-1</sup> ) | $E_{\text{MCB}}$<br>(GW kg <sup>-1</sup> s) |
|--------------------------------------------------------------------|-------|--------------------------------|----------------------------------------------------------------------------------|---------------------------------------------|
| Natural $\times 5$                                                 | WP    | 0.46                           | 0.085                                                                            | 5.33                                        |
|                                                                    | NP    | 2.1                            | 0.057                                                                            | 37.0                                        |
|                                                                    | Equa  | 0.07                           | 0.052                                                                            | 1.40                                        |
|                                                                    | SP    | 1.7                            | 0.034                                                                            | 48.5                                        |
|                                                                    | SA    | 1.4                            | 0.031                                                                            | 43.8                                        |
| Wind-adjusted                                                      | WP    | 3.8                            | 0.19                                                                             | 20.5                                        |
|                                                                    | NP    | 8.4                            | 0.20                                                                             | 41.1                                        |
|                                                                    | Equa  | 1.4                            | 0.19                                                                             | 7.66                                        |
|                                                                    | SP    | 7.6                            | 0.18                                                                             | 42.2                                        |
|                                                                    | SA    | 8.0                            | 0.21                                                                             | 37.5                                        |
| Fixed at $10^{-9}$ kg m <sup>-2</sup> s <sup>-1</sup>              | WP    | 18                             | 0.99                                                                             | 17.7                                        |
|                                                                    | NP    | 23                             | 1.0                                                                              | 23.0                                        |
|                                                                    | Equa  | 11                             | 1.0                                                                              | 10.9                                        |
|                                                                    | SP    | 25                             | 1.0                                                                              | 25.0                                        |
|                                                                    | SA    | 22                             | 1.0                                                                              | 22.5                                        |
| $10^{-9}$ kg m <sup>-2</sup> s <sup>-1</sup> in the sensitive area | WP    | 0.49                           | 0.05                                                                             | 10.2                                        |
|                                                                    | NP    | 2.7                            | 0.05                                                                             | 53.4                                        |
|                                                                    | Equa  | 0.83                           | 0.05                                                                             | 16.5                                        |
|                                                                    | SP    | 3.4                            | 0.05                                                                             | 67.0                                        |
|                                                                    | SA    | 1.7                            | 0.05                                                                             | 34.9                                        |
| Fixed-wind-adjusted                                                | WP    | 6.9                            | 1.0                                                                              | 6.88                                        |
|                                                                    | NP    | 16                             | 1.0                                                                              | 16.1                                        |
|                                                                    | Equa  | 5.0                            | 1.0                                                                              | 5.04                                        |
|                                                                    | SP    | 17                             | 1.0                                                                              | 16.6                                        |
|                                                                    | SA    | 20                             | 1.0                                                                              | 19.7                                        |

**Table S3.** Grid coordinates and latitude and longitude ranges of sensitive areas.

| Region | Start_x, End_x<br>(in grid) | Start_y, End_y<br>(in grid) | Start_Lat,<br>End_Lat | Start_Lon,<br>End_Lon |
|--------|-----------------------------|-----------------------------|-----------------------|-----------------------|
| WP     | (70, 119)                   | (98, 127)                   | (28.18, 31.66)        | (156.7, 162.6)        |
| NP     | (40, 69)                    | (40, 89)                    | (24.86, 30.34)        | (-153.4, -150.5)      |
| Equa   | (40, 89)                    | (103, 132)                  | (18.15, 21.25)        | (130.0, 135.2)        |
| SP     | (65, 94)                    | (75, 124)                   | (-26.18, -20.84)      | (-92.56, -89.06)      |
| SA     | (40, 89)                    | (101, 130)                  | (-13.77, -10.76)      | (-13.03, -7.530)      |

## References

- Ahlm, L., Jones, A., Stjern, C. W., Muri, H., Kravitz, B., and Kristjánsson, J. E.: Marine cloud brightening – as effective without clouds, *Atmospheric Chemistry and Physics*, 17, 13071–13087, <https://doi.org/10.5194/acp-17-13071-2017>, 2017.
- Alterskjær, K. and Kristjánsson, J. E.: The sign of the radiative forcing from marine cloud brightening depends on both particle size and injection amount, *Geophysical Research Letters*, 40, 210–215, <https://doi.org/10.1029/2012GL054286>, 2013.
- Alterskjær, K., Kristjánsson, J. E., and Seland, Ø.: Sensitivity to deliberate sea salt seeding of marine clouds – observations and model simulations, *Atmospheric Chemistry and Physics*, 12, 2795–2807, <https://doi.org/10.5194/acp-12-2795-2012>, 2012.
- Alterskjær, K., Kristjánsson, J. E., Boucher, O., Muri, H., Niemeier, U., Schmidt, H., Schulz, M., and Timmreck, C.: Sea-salt injections into the low-latitude marine boundary layer: The transient response in three Earth system models, *Journal of Geophysical Research: Atmospheres*, 118, 12,195-12,206, <https://doi.org/10.1002/2013JD020432>, 2013.
- Andrejczuk, M., Gadian, A., and Blyth, A.: Numerical simulations of stratocumulus cloud response to aerosol perturbation, *Atmospheric Research*, 140–141, 76–84, <https://doi.org/10.1016/j.atmosres.2014.01.006>, 2014.
- Aswathy, V. N., Boucher, O., Quaas, M., Niemeier, U., Muri, H., Mülmenstädt, J., and Quaas, J.: Climate extremes in multi-model simulations of stratospheric aerosol and marine cloud brightening climate engineering, *Atmospheric Chemistry and Physics*, 15, 9593–9610, <https://doi.org/10.5194/acp-15-9593-2015>, 2015.
- Bala, G., Caldeira, K., Nemani, R., Cao, L., Ban-Weiss, G., and Shin, H.-J.: Albedo enhancement of marine clouds to counteract global warming: impacts on the hydrological cycle, *Clim Dyn*, 37, 915–931, <https://doi.org/10.1007/s00382-010-0868-1>, 2011.
- Baughman, E., Gnanadesikan, A., Degaetano, A., and Adcroft, A.: Investigation of the Surface and Circulation Impacts of Cloud-Brightening Geoengineering, *Journal of Climate*, 25, 7527–7543, <https://doi.org/10.1175/JCLI-D-11-00282.1>, 2012.
- Boucher, O., Kleinschmitt, C., and Myhre, G.: Quasi-Additivity of the Radiative Effects of Marine Cloud Brightening and Stratospheric Sulfate Aerosol Injection, *Geophysical Research Letters*, 44, 11,158-11,165, <https://doi.org/10.1002/2017GL074647>, 2017.
- Bower, K., Choullarton, T., Latham, J., Sahraei, J., and Salter, S.: Computational assessment of a proposed technique for global warming mitigation via albedo-enhancement of marine stratocumulus clouds, *Atmospheric Research*, 82, 328–336, <https://doi.org/10.1016/j.atmosres.2005.11.013>, 2006.
- Connolly, P. J., McFiggans, G. B., Wood, R., and Tsiamis, A.: Factors determining the most efficient spray distribution for marine cloud brightening, *Philosophical Transactions of the Royal Society A: Mathematical, Physical and Engineering Sciences*, 372, 20140056, <https://doi.org/10.1098/rsta.2014.0056>, 2014.
- Crook, J. A., Jackson, L. S., Osprey, S. M., and Forster, P. M.: A comparison of temperature and precipitation responses to different Earth radiation management geoengineering schemes, *Journal of Geophysical Research: Atmospheres*, 120, 9352–9373, <https://doi.org/10.1002/2015JD023269>, 2015.
- Duan, L., Cao, L., Bala, G., and Caldeira, K.: Comparison of the Fast and Slow Climate Response to Three Radiation Management Geoengineering Schemes, *Journal of Geophysical Research: Atmospheres*, 123, 11,980-12,001, <https://doi.org/10.1029/2018JD029034>, 2018.
- Gadian, A.: Marine cloud brightening: the effect on global surface temperatures, *Journal of Earth Science & Climatic Change*, 01, <https://doi.org/10.4172/2157-7617.S1.002>, 2012.

- Goddard, P. B., Kravitz, B., MacMartin, D. G., and Wang, H.: The Shortwave Radiative Flux Response to an Injection of Sea Salt Aerosols in the Gulf of Mexico, *Journal of Geophysical Research: Atmospheres*, 127, e2022JD037067, <https://doi.org/10.1029/2022JD037067>, 2022.
- Haywood, J. M., Jones, A., Jones, A. C., and Rasch, P. J.: Climate Intervention using marine cloud brightening (MCB) compared with stratospheric aerosol injection (SAI) in the UKESM1 climate model, *EGUsphere*, 1–38, <https://doi.org/10.5194/egusphere-2023-1611>, 2023.
- Hill, S. and Ming, Y.: Nonlinear climate response to regional brightening of tropical marine stratocumulus, *Geophysical Research Letters*, 39, <https://doi.org/10.1029/2012GL052064>, 2012.
- Hoffmann, F. and Feingold, G.: Cloud Microphysical Implications for Marine Cloud Brightening: The Importance of the Seeded Particle Size Distribution, *Journal of the Atmospheric Sciences*, 78, 3247–3262, <https://doi.org/10.1175/JAS-D-21-0077.1>, 2021.
- Horowitz, H. M., Holmes, C., Wright, A., Sherwen, T., Wang, X., Evans, M., Huang, J., Jaeglé, L., Chen, Q., Zhai, S., and Alexander, B.: Effects of Sea Salt Aerosol Emissions for Marine Cloud Brightening on Atmospheric Chemistry: Implications for Radiative Forcing, *Geophysical Research Letters*, 47, e2019GL085838, <https://doi.org/10.1029/2019GL085838>, 2020.
- Jenkins, A. K. L., Forster, P. M., and Jackson, L. S.: The effects of timing and rate of marine cloud brightening aerosol injection on albedo changes during the diurnal cycle of marine stratocumulus clouds, *Atmospheric Chemistry and Physics*, 13, 1659–1673, <https://doi.org/10.5194/acp-13-1659-2013>, 2013.
- Jones, A. and Haywood, J. M.: Sea-spray geoengineering in the HadGEM2-ES earth-system model: radiative impact and climate response, *Atmospheric Chemistry and Physics*, 12, 10887–10898, <https://doi.org/10.5194/acp-12-10887-2012>, 2012.
- Jones, A., Haywood, J., and Boucher, O.: Climate impacts of geoengineering marine stratocumulus clouds, *Journal of Geophysical Research: Atmospheres*, 114, <https://doi.org/10.1029/2008JD011450>, 2009.
- Jones, A., Haywood, J., and Boucher, O.: A comparison of the climate impacts of geoengineering by stratospheric SO<sub>2</sub> injection and by brightening of marine stratocumulus cloud, *Atmospheric Science Letters*, 12, 176–183, <https://doi.org/10.1002/asl.291>, 2011.
- Kim, D.-H., Shin, H.-J., and Chung, I.-U.: Geoengineering: Impact of Marine Cloud Brightening Control on the Extreme Temperature Change over East Asia, *Atmosphere*, 11, 1345, <https://doi.org/10.3390/atmos11121345>, 2020.
- Korhonen, H., Carslaw, K. S., and Romakkaniemi, S.: Enhancement of marine cloud albedo via controlled sea spray injections: a global model study of the influence of emission rates, microphysics and transport, *Atmospheric Chemistry and Physics*, 10, 4133–4143, <https://doi.org/10.5194/acp-10-4133-2010>, 2010.
- Kravitz, B., Forster, P. M., Jones, A., Robock, A., Alterskjær, K., Boucher, O., Jenkins, A. K. L., Korhonen, H., Kristjánsson, J. E., Muri, H., Niemeier, U., Partanen, A.-I., Rasch, P. J., Wang, H., and Watanabe, S.: Sea spray geoengineering experiments in the geoengineering model intercomparison project (GeoMIP): Experimental design and preliminary results, *Journal of Geophysical Research: Atmospheres*, 118, 1175–1186, <https://doi.org/10.1002/jgrd.50856>, 2013.
- Kravitz, B., Wang, H., Rasch, P. J., Morrison, H., and Solomon, A. B.: Process-model simulations of cloud albedo enhancement by aerosols in the Arctic, *Phil. Trans. R. Soc. A.*, 372, 20140052, <https://doi.org/10.1098/rsta.2014.0052>, 2014.
- Latham, J.: Amelioration of global warming by controlled enhancement of the albedo and longevity of low-level maritime clouds, *Atmospheric Science Letters*, 3, 52–58, <https://doi.org/10.1006/asle.2002.0048>, 2002.
- Latham, J., Rasch, P., Chen, C.-C., Kettles, L., Gadian, A., Gettelman, A., Morrison, H., Bower, K., and Choulaton, T.: Global



temperature stabilization via controlled albedo enhancement of low-level maritime clouds, *Philosophical Transactions of the Royal Society A: Mathematical, Physical and Engineering Sciences*, 366, 3969–3987, <https://doi.org/10.1098/rsta.2008.0137>, 2008.

Latham, J., Bower, K., Choullarton, T., Coe, H., Connolly, P., Cooper, G., Craft, T., Foster, J., Gadian, A., Galbraith, L., Iacovides, H., Johnston, D., Launder, B., Leslie, B., Meyer, J., Neukermans, A., Ormond, B., Parkes, B., Rasch, P., Rush, J., Salter, S., Stevenson, T., Wang, H., Wang, Q., and Wood, R.: Marine cloud brightening, *Philosophical Transactions of the Royal Society A: Mathematical, Physical and Engineering Sciences*, 370, 4217–4262, <https://doi.org/10.1098/rsta.2012.0086>, 2012a.

Latham, J., Parkes, B., Gadian, A., and Salter, S.: Weakening of hurricanes via marine cloud brightening (MCB), *Atmospheric Science Letters*, 13, 231–237, <https://doi.org/10.1002/asl.402>, 2012b.

Latham, J., Gadian, A., Fournier, J., Parkes, B., Wadhams, P., and Chen, J.: Marine cloud brightening: regional applications, *Philosophical Transactions of the Royal Society A: Mathematical, Physical and Engineering Sciences*, 372, 20140053, <https://doi.org/10.1098/rsta.2014.0053>, 2014.

Maalick, Z., Korhonen, H., Kokkola, H., Kühn, T., and Romakkaniemi, S.: Modelling artificial sea salt emission in large eddy simulations, *Philosophical Transactions of the Royal Society A: Mathematical, Physical and Engineering Sciences*, 372, 20140051, <https://doi.org/10.1098/rsta.2014.0051>, 2014.

Mahfouz, N. G. A., Hill, S. A., Guo, H., and Ming, Y.: The Radiative and Cloud Responses to Sea Salt Aerosol Engineering in GFDL Models, *Geophysical Research Letters*, 50, e2022GL102340, <https://doi.org/10.1029/2022GL102340>, 2023.

Martin, G. M., Johnson, D. W., and Spice, A.: The Measurement and Parameterization of Effective Radius of Droplets in Warm Stratocumulus Clouds, *Journal of the Atmospheric Sciences*, 51, 1823–1842, [https://doi.org/10.1175/1520-0469\(1994\)051<1823:TMAPOE>2.0.CO;2](https://doi.org/10.1175/1520-0469(1994)051<1823:TMAPOE>2.0.CO;2), 1994.

Muri, H., Niemeier, U., and Kristjánsson, J. E.: Tropical rainforest response to marine sky brightening climate engineering, *Geophysical Research Letters*, 42, 2951–2960, <https://doi.org/10.1002/2015GL063363>, 2015.

Muri, H., Tjiputra, J., Otterå, O. H., Adakudlu, M., Lauvset, S. K., Grini, A., Schulz, M., Niemeier, U., and Kristjánsson, J. E.: Climate Response to Aerosol Geoengineering: A Multimethod Comparison, *Journal of Climate*, 31, 6319–6340, <https://doi.org/10.1175/JCLI-D-17-0620.1>, 2018.

Niemeier, U., Schmidt, H., Alterskjær, K., and Kristjánsson, J. E.: Solar irradiance reduction via climate engineering: Impact of different techniques on the energy balance and the hydrological cycle, *Journal of Geophysical Research: Atmospheres*, 118, 11,905–11,917, <https://doi.org/10.1002/2013JD020445>, 2013.

Parkes, B., Gadian, A., and Latham, J.: The Effects of Marine Cloud Brightening on Seasonal Polar Temperatures and the Meridional Heat Flux, *International Scholarly Research Notices*, 2012, e142872, <https://doi.org/10.5402/2012/142872>, 2012.

Parkes, B., Challinor, A., and Nicklin, K.: Crop failure rates in a geoengineered climate: impact of climate change and marine cloud brightening, *Environ. Res. Lett.*, 10, 084003, <https://doi.org/10.1088/1748-9326/10/8/084003>, 2015.

Partanen, A.-I., Kokkola, H., Romakkaniemi, S., Kerminen, V.-M., Lehtinen, K. E. J., Bergman, T., Arola, A., and Korhonen, H.: Direct and indirect effects of sea spray geoengineering and the role of injected particle size, *Journal of Geophysical Research: Atmospheres*, 117, <https://doi.org/10.1029/2011JD016428>, 2012.

Partanen, A.-I., Keller, D. P., Korhonen, H., and Matthews, H. D.: Impacts of sea spray geoengineering on ocean biogeochemistry, *Geophysical Research Letters*, 43, 7600–7608, <https://doi.org/10.1002/2016GL070111>, 2016.

- Prabhakaran, P., Hoffmann, F., and Feingold, G.: Evaluation of Pulse Aerosol Forcing on Marine Stratocumulus Clouds in the Context of Marine Cloud Brightening, *Journal of the Atmospheric Sciences*, 80, 1585–1604, <https://doi.org/10.1175/JAS-D-22-0207.1>, 2023.
- Pringle, K. J., Carslaw, K. S., Fan, T., Mann, G. W., Hill, A., Stier, P., Zhang, K., and Tost, H.: A multi-model assessment of the impact of sea spray geoengineering on cloud droplet number, *Atmospheric Chemistry and Physics*, 12, 11647–11663, <https://doi.org/10.5194/acp-12-11647-2012>, 2012.
- Rasch, P. J., Latham, J., and Chen, C.-C. (Jack): Geoengineering by cloud seeding: influence on sea ice and climate system, *Environ. Res. Lett.*, 4, 045112, <https://doi.org/10.1088/1748-9326/4/4/045112>, 2009.
- Schwartz, S. E., Harshvardhan, and Benkovitz, C. M.: Influence of anthropogenic aerosol on cloud optical depth and albedo shown by satellite measurements and chemical transport modeling, *Proceedings of the National Academy of Sciences*, 99, 1784–1789, <https://doi.org/10.1073/pnas.261712099>, 2002.
- Stephens, G. L.: Radiation Profiles in Extended Water Clouds. II: Parameterization Schemes, *Journal of the Atmospheric Sciences*, 35, 2123–2132, [https://doi.org/10.1175/1520-0469\(1978\)035<2123:RPIEWC>2.0.CO;2](https://doi.org/10.1175/1520-0469(1978)035<2123:RPIEWC>2.0.CO;2), 1978.
- Stjern, C. W., Muri, H., Ahlm, L., Boucher, O., Cole, J. N. S., Ji, D., Jones, A., Haywood, J., Kravitz, B., Lenton, A., Moore, J. C., Niemeier, U., Phipps, S. J., Schmidt, H., Watanabe, S., and Kristjánsson, J. E.: Response to marine cloud brightening in a multi-model ensemble, *Atmospheric Chemistry and Physics*, 18, 621–634, <https://doi.org/10.5194/acp-18-621-2018>, 2018.
- Stuart, G. S., Stevens, R. G., Partanen, A.-I., Jenkins, A. K. L., Korhonen, H., Forster, P. M., Spracklen, D. V., and Pierce, J. R.: Reduced efficacy of marine cloud brightening geoengineering due to in-plume aerosol coagulation: parameterization and global implications, *Atmospheric Chemistry and Physics*, 13, 10385–10396, <https://doi.org/10.5194/acp-13-10385-2013>, 2013.
- Wang, H., Rasch, P. J., and Feingold, G.: Manipulating marine stratocumulus cloud amount and albedo: a process-modelling study of aerosol-cloud-precipitation interactions in response to injection of cloud condensation nuclei, *Atmospheric Chemistry and Physics*, 11, 4237–4249, <https://doi.org/10.5194/acp-11-4237-2011>, 2011.
- Wood, R.: Cancellation of Aerosol Indirect Effects in Marine Stratocumulus through Cloud Thinning, *Journal of the Atmospheric Sciences*, 64, 2657–2669, <https://doi.org/10.1175/JAS3942.1>, 2007.
- Wood, R.: Assessing the potential efficacy of marine cloud brightening for cooling Earth using a simple heuristic model, *Atmospheric Chemistry and Physics*, 21, 14507–14533, <https://doi.org/10.5194/acp-21-14507-2021>, 2021.
- Xie, M., Moore, J. C., Zhao, L., Wolovick, M., and Muri, H.: Impacts of three types of solar geoengineering on the Atlantic Meridional Overturning Circulation, *Atmospheric Chemistry and Physics*, 22, 4581–4597, <https://doi.org/10.5194/acp-22-4581-2022>, 2022.
- Zhao, M., Cao, L., Duan, L., Bala, G., and Caldeira, K.: Climate More Responsive to Marine Cloud Brightening Than Ocean Albedo Modification: A Model Study, *Journal of Geophysical Research: Atmospheres*, 126, e2020JD033256, <https://doi.org/10.1029/2020JD033256>, 2021.
- Zhu, Y., Zhang, Z., and Crabbe, M. J. C.: Extreme climate response to marine cloud brightening in the arid Sahara-Sahel-Arabian Peninsula zone, *International Journal of Climate Change Strategies and Management*, 13, 250–265, <https://doi.org/10.1108/IJCCSM-06-2020-0051>, 2021.
